# Supplementary material for: EAES/SAGES evidence-based recommendations and expert consensus on optimization of perioperative care in older adults
Source: PubMed Central journal article supplement (PMC11289045; doi:10.1007/s00464-024-10977-7), 2024-06-28
Supplement: 464_2024_10977_MOESM5_ESM.pdf [file 464_2024_10977_MOESM5_ESM.pdf]

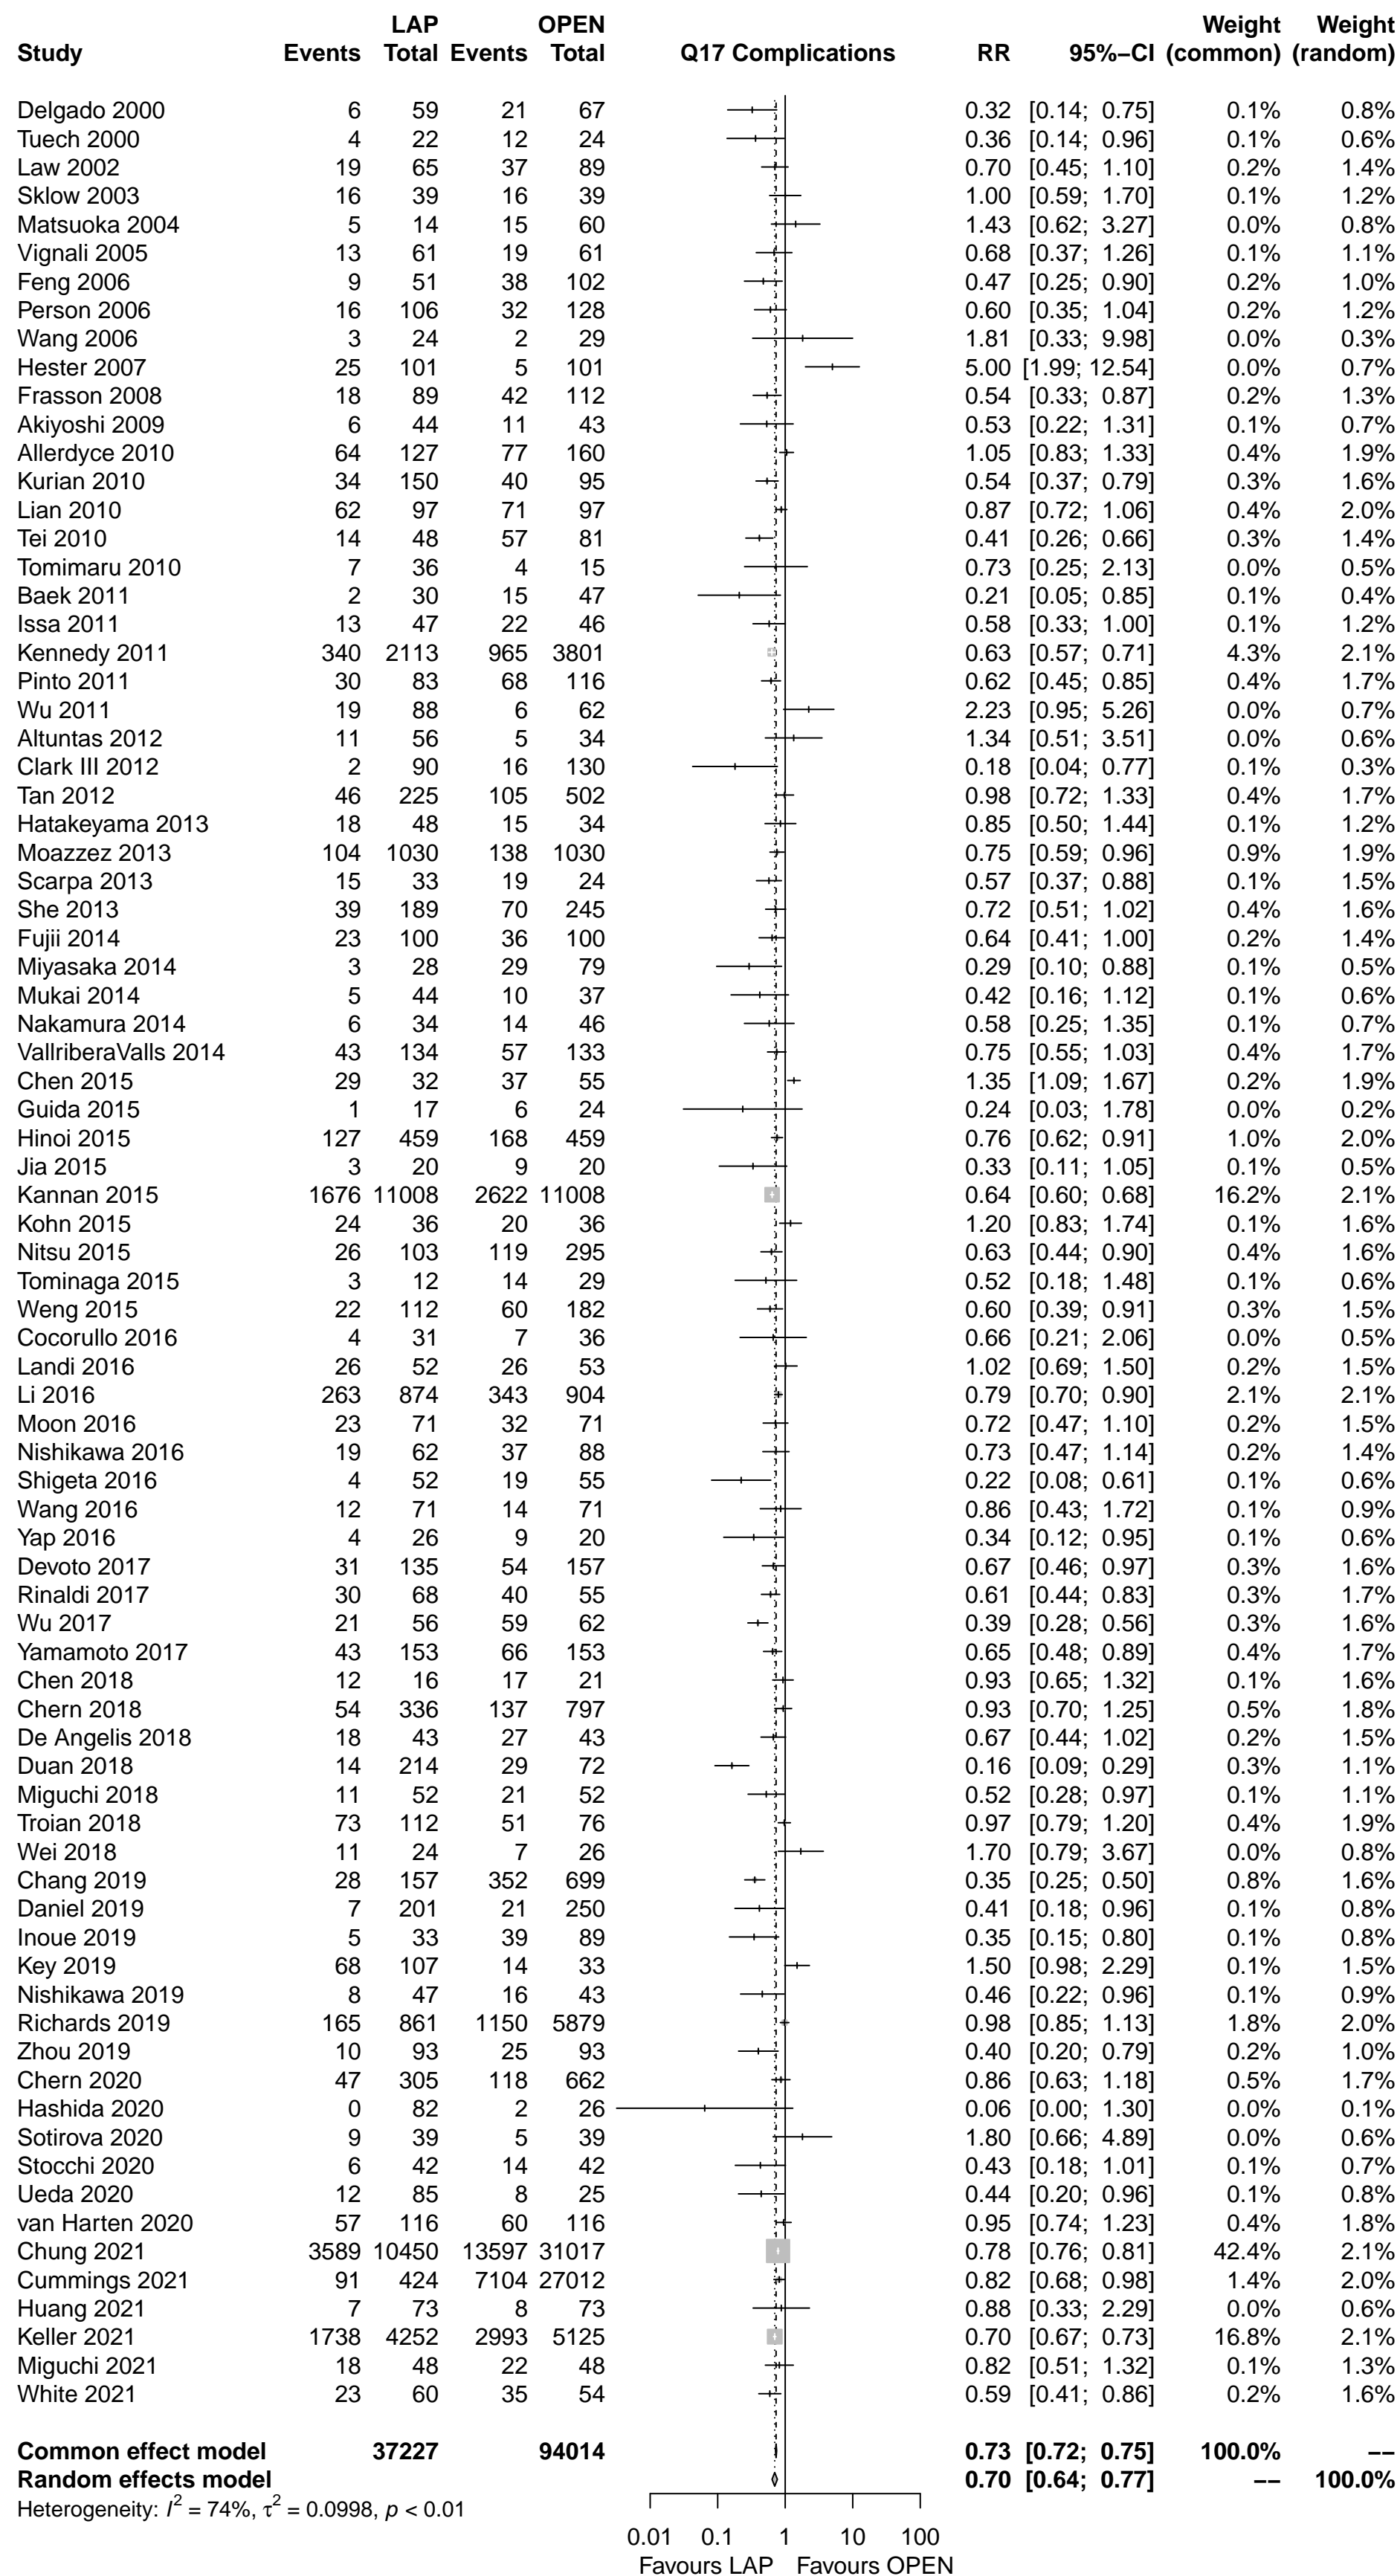

Q17 Complications - Subgroups

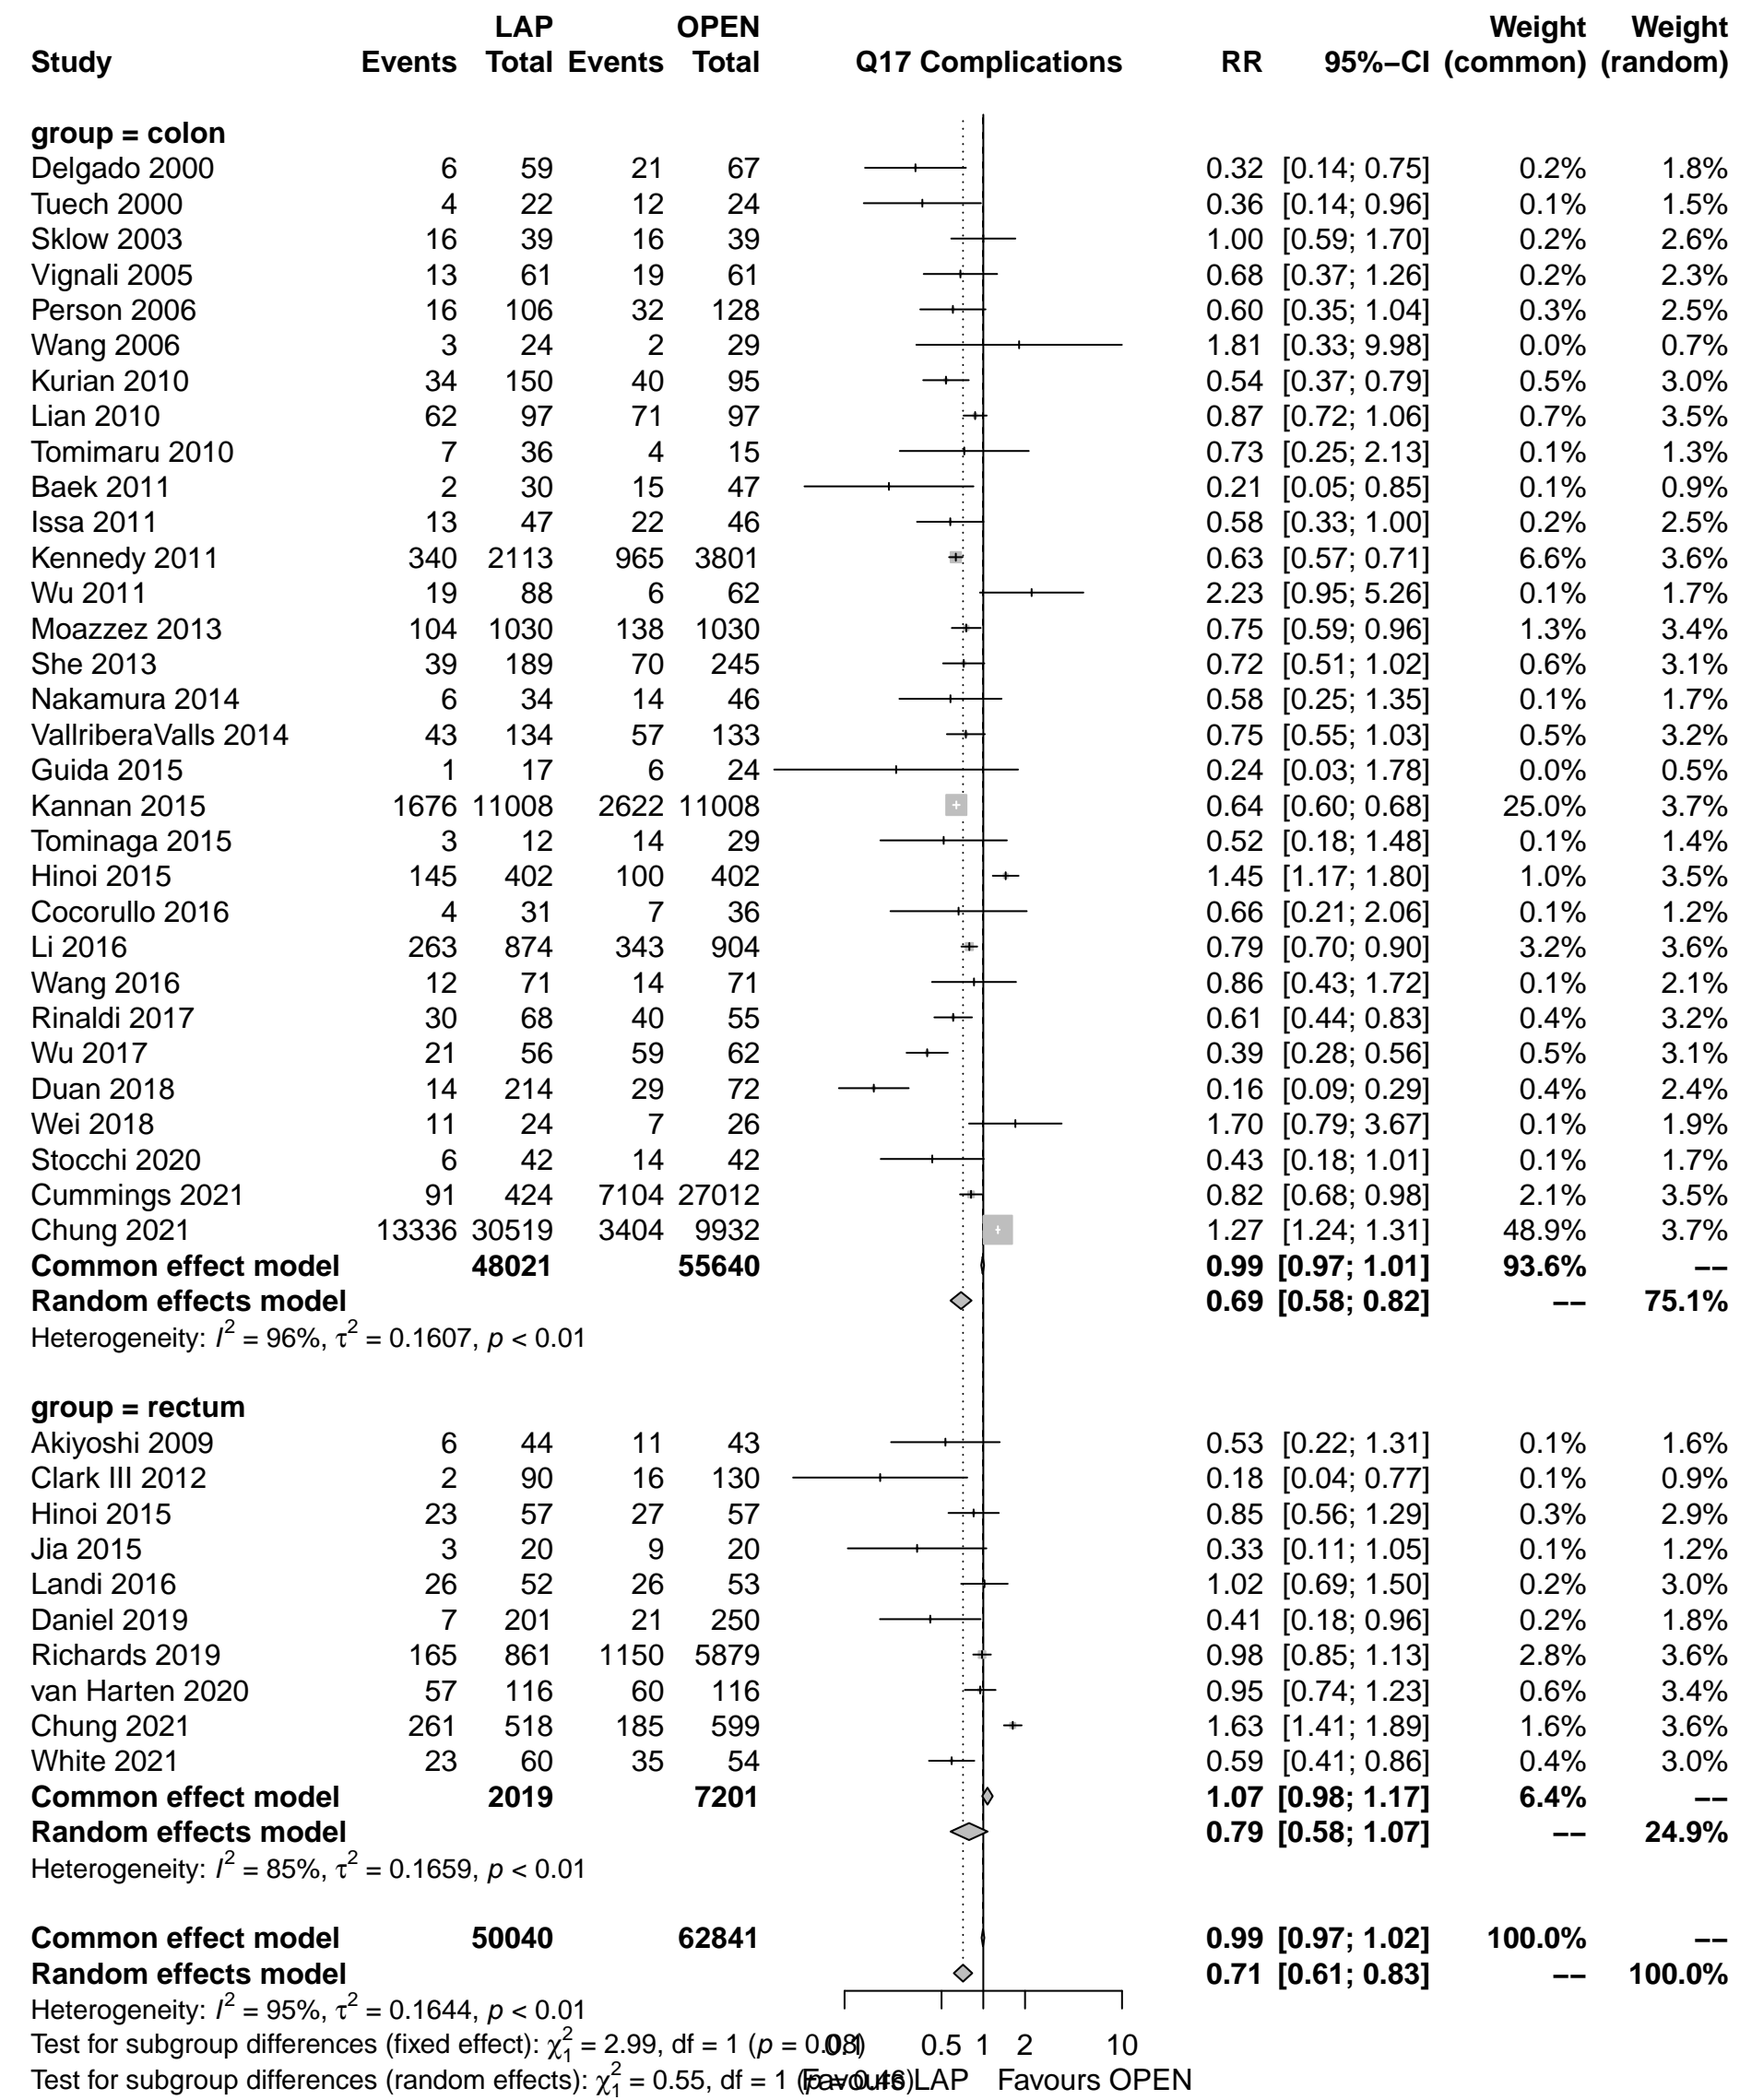

## Q17 Length of Stay

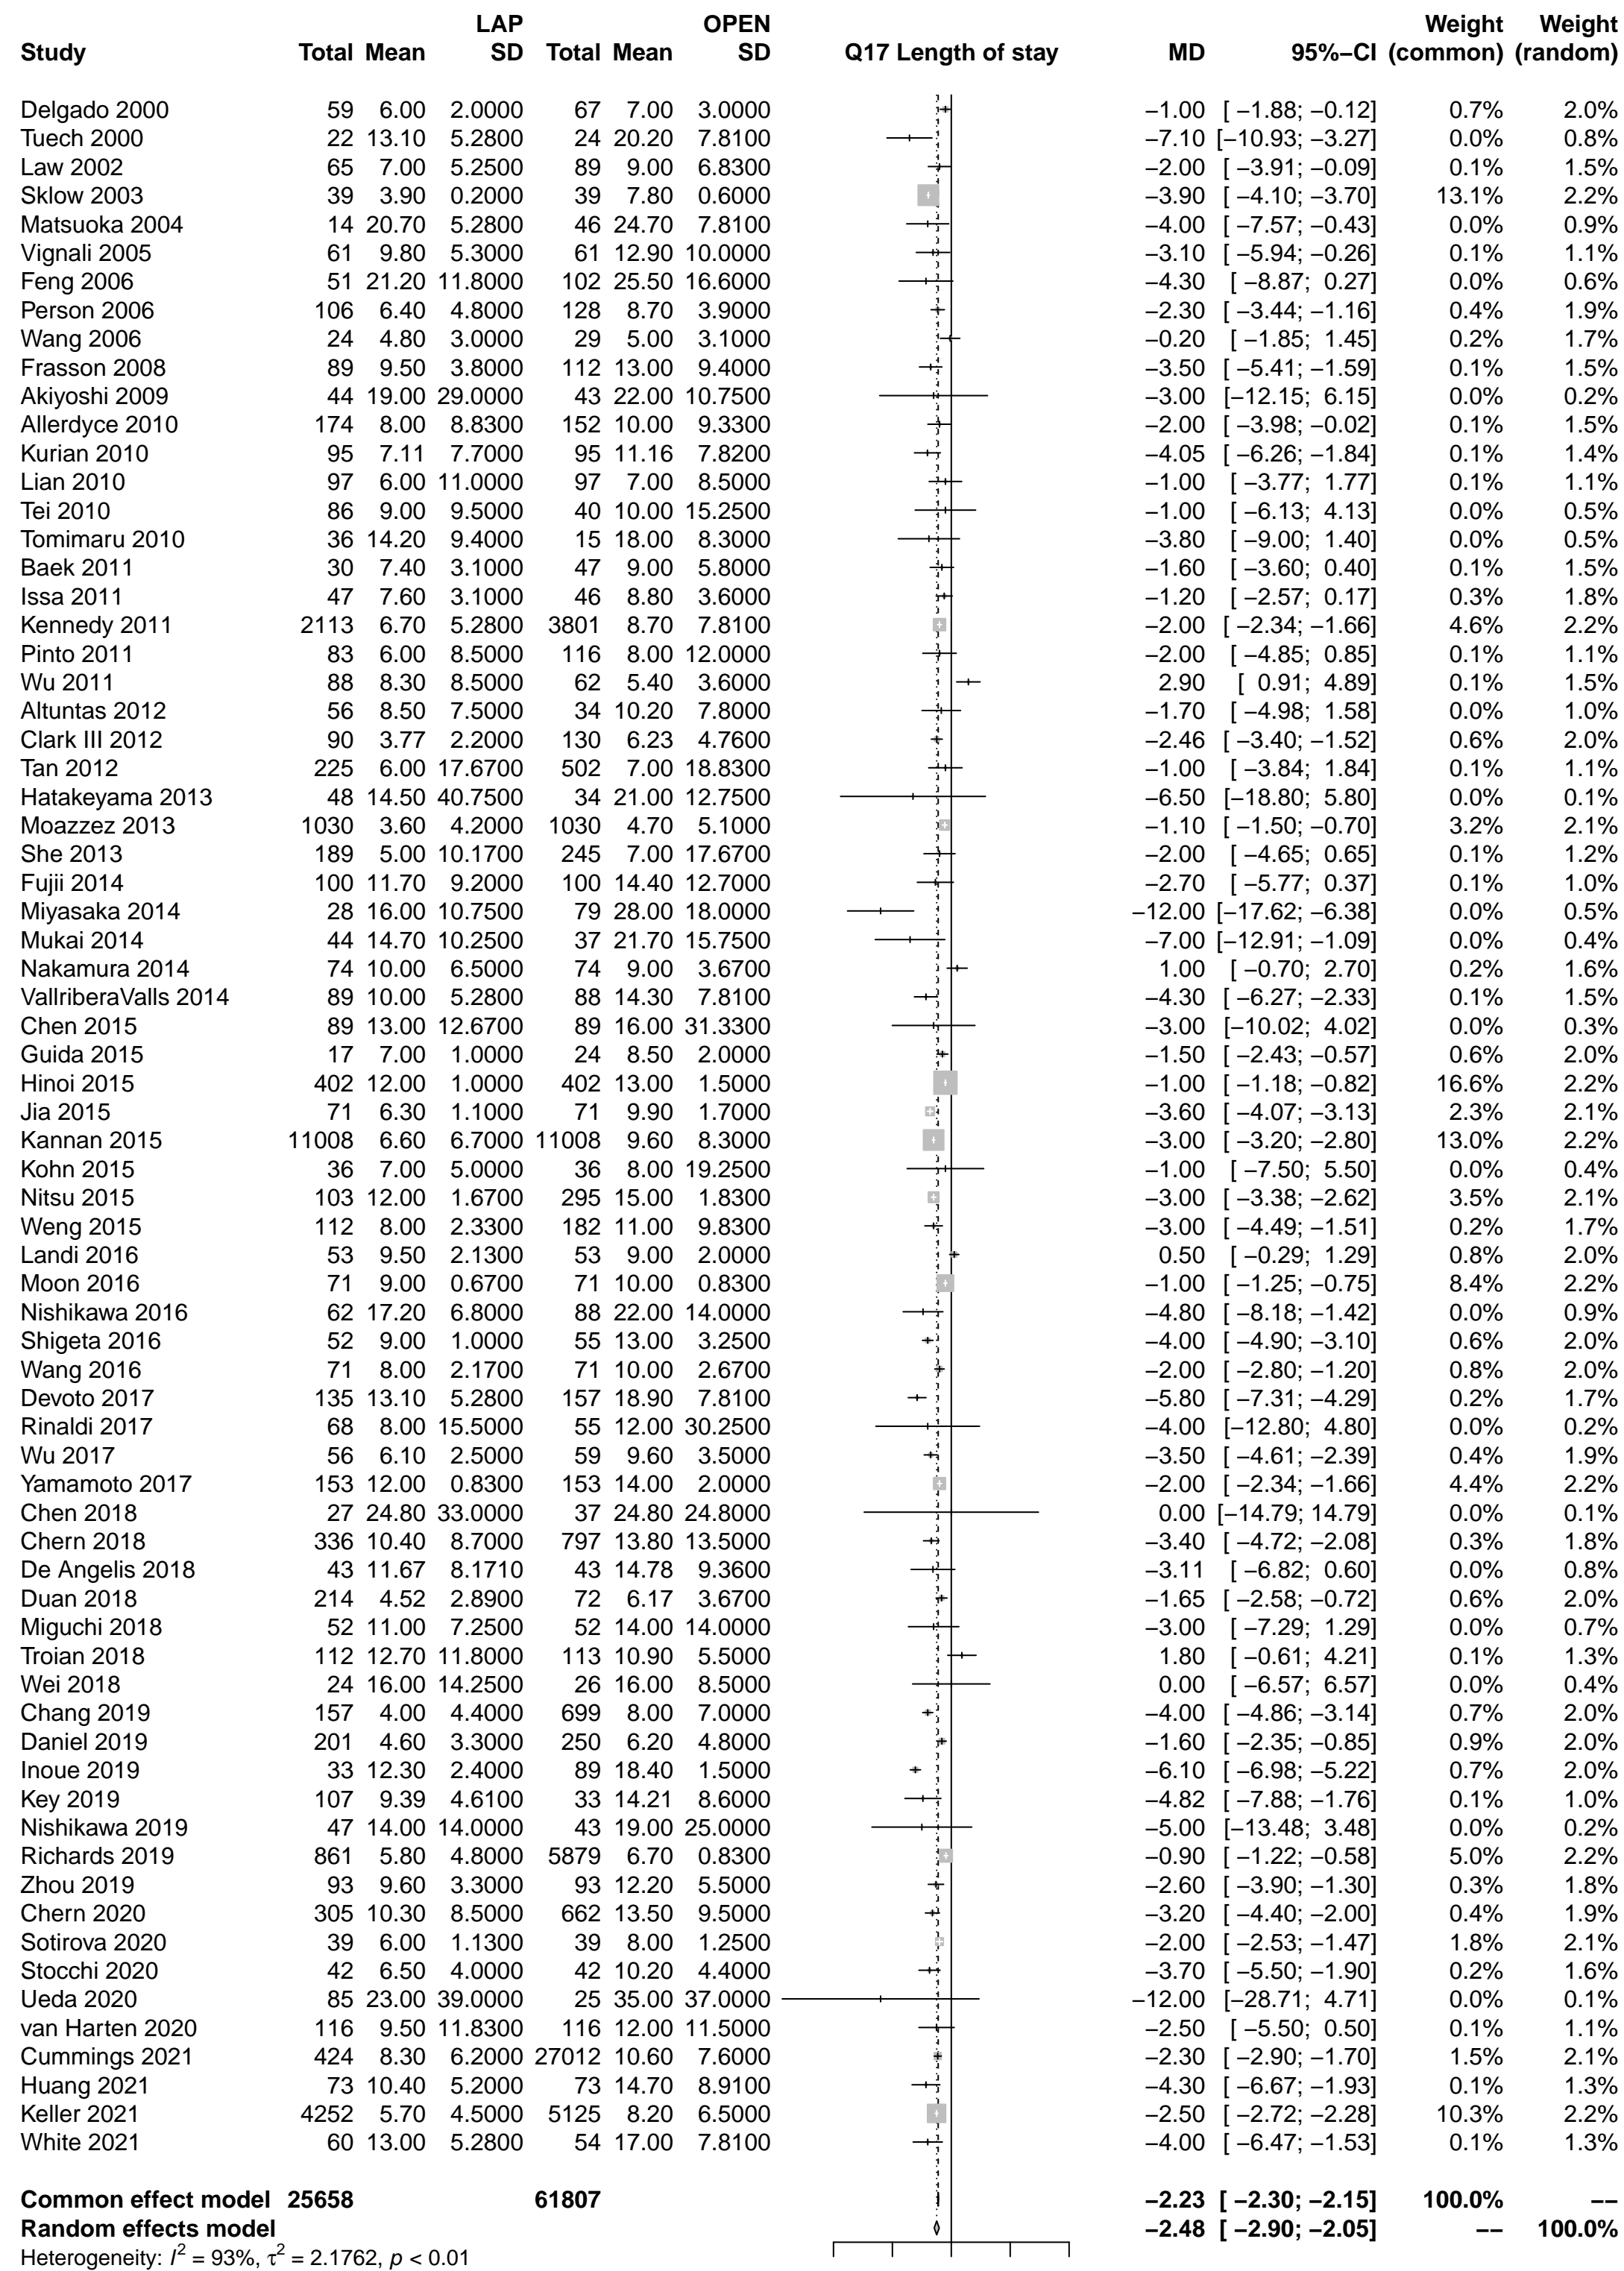

-20 -10 0 10 20  
Favours LAP Favours OPEN

## Q17 Length of Stay - Subgroups

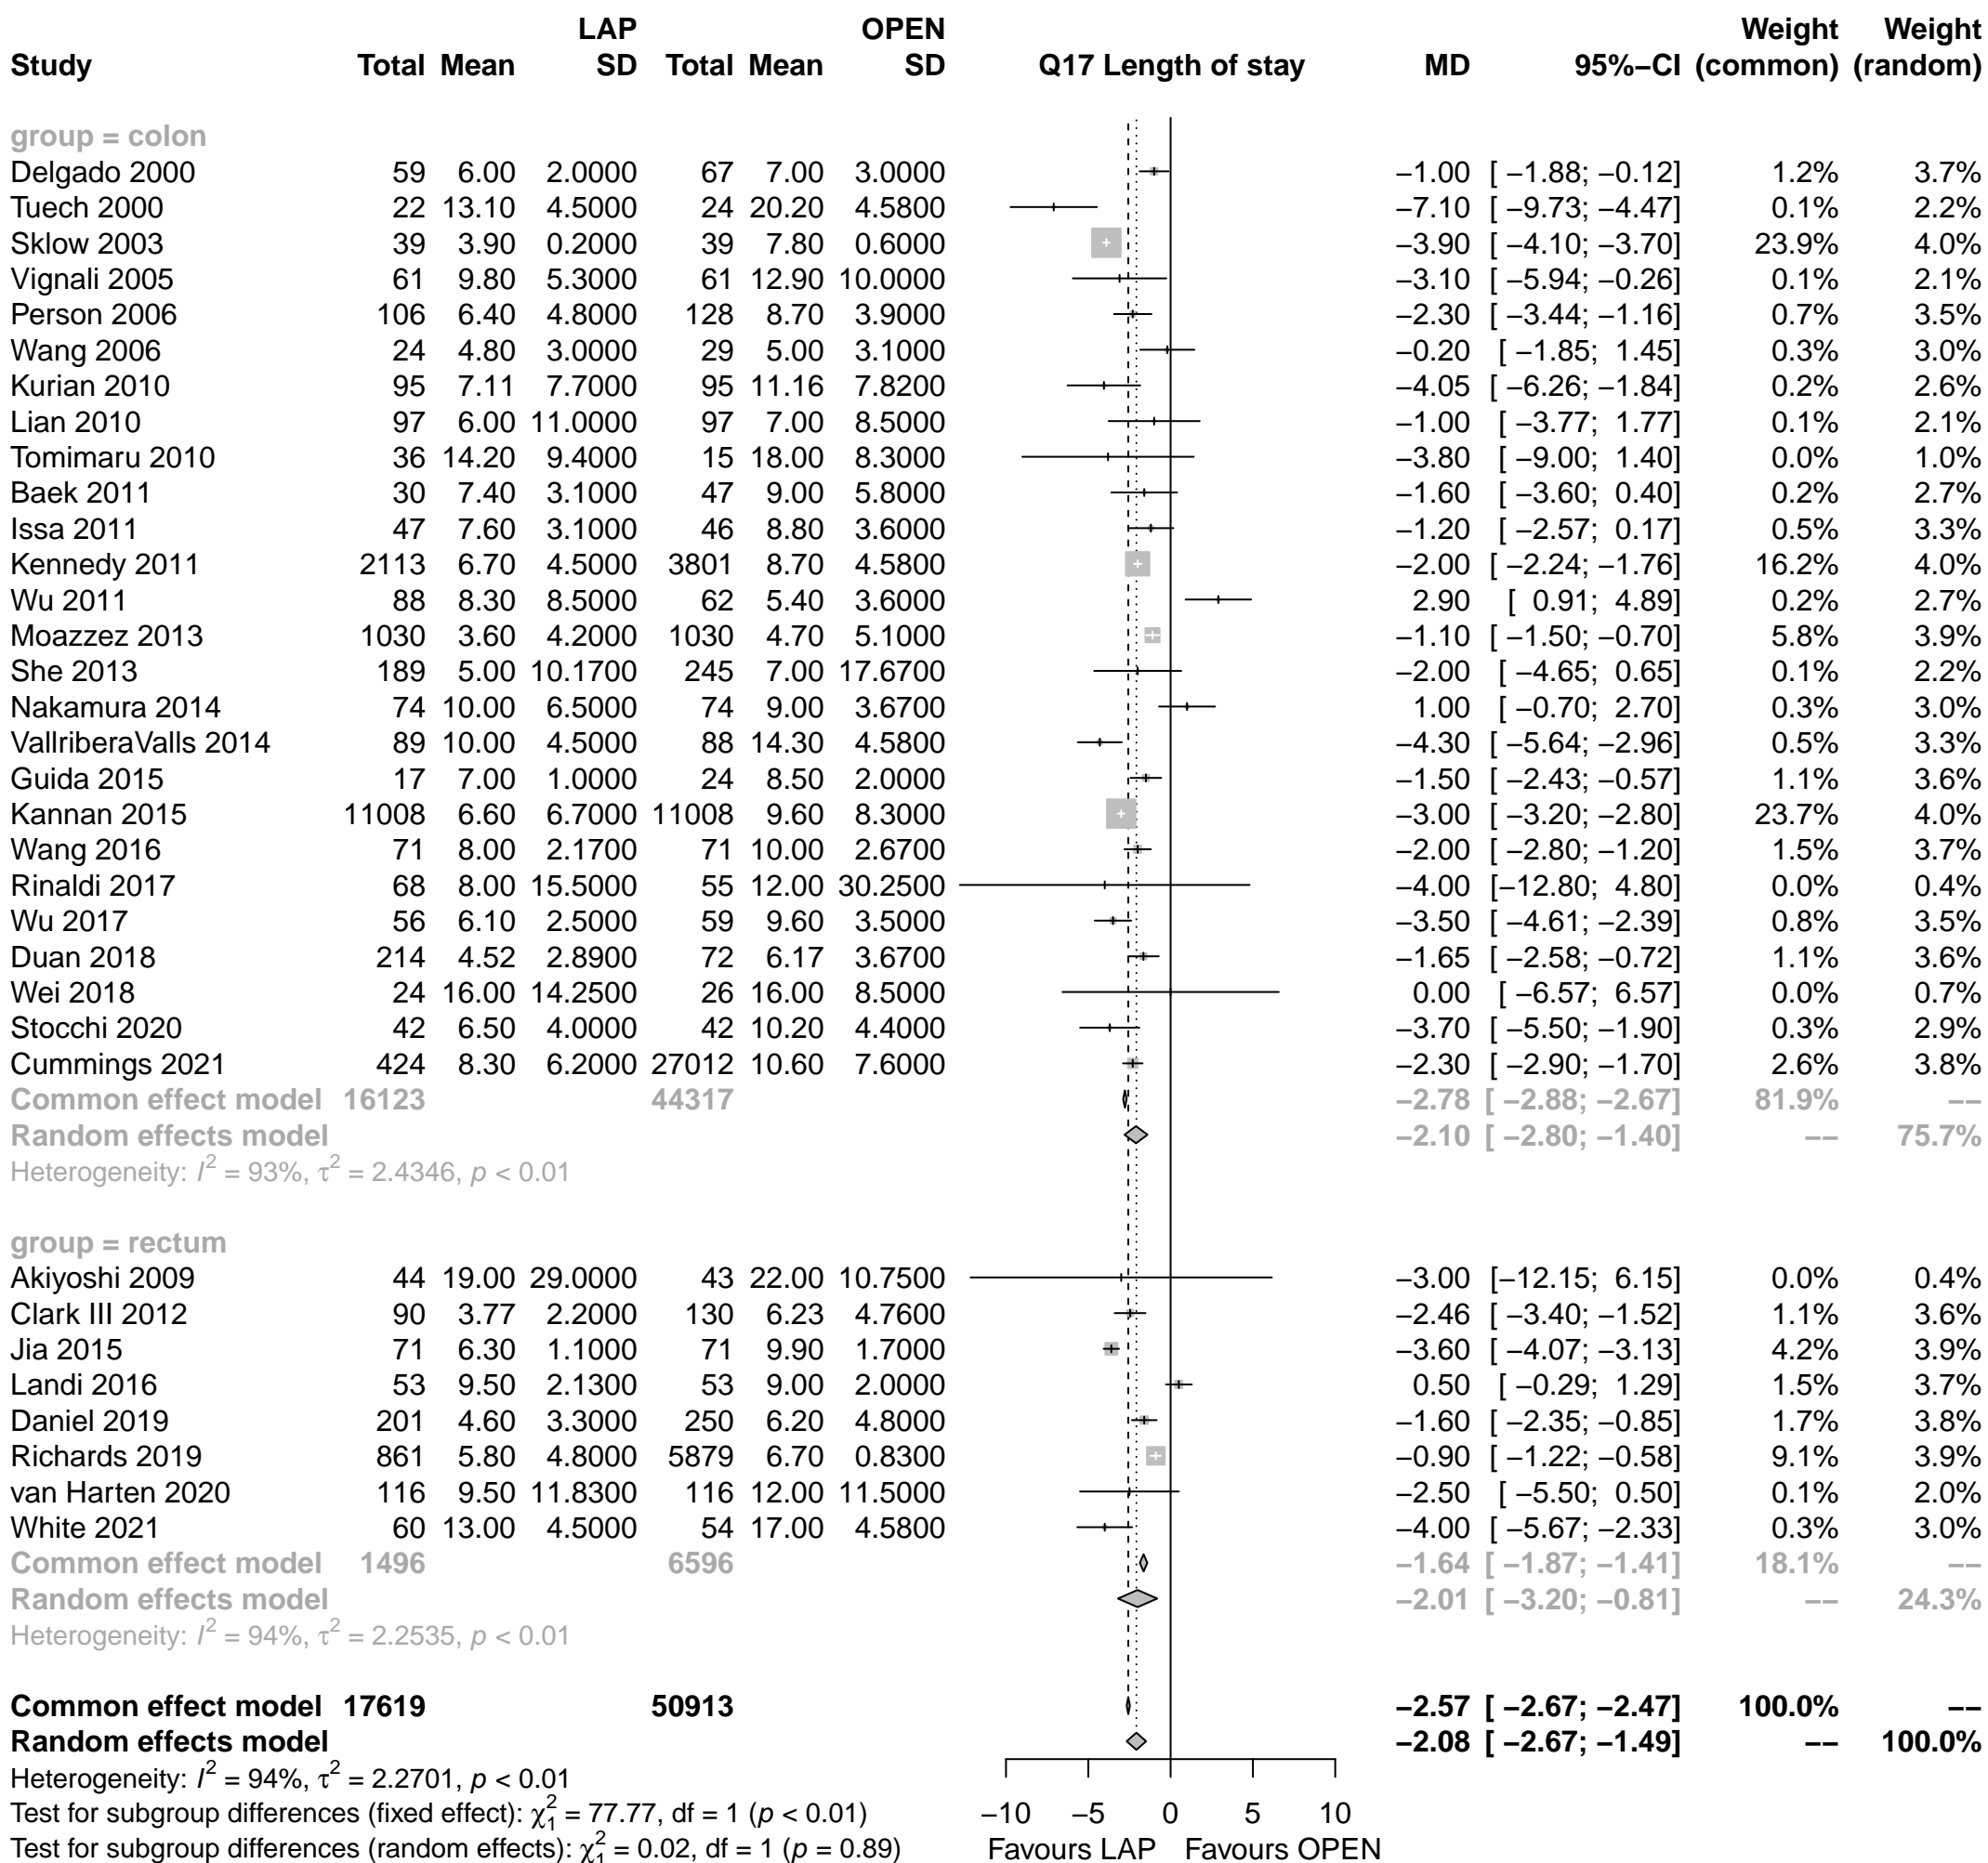

Q17 Readmissions

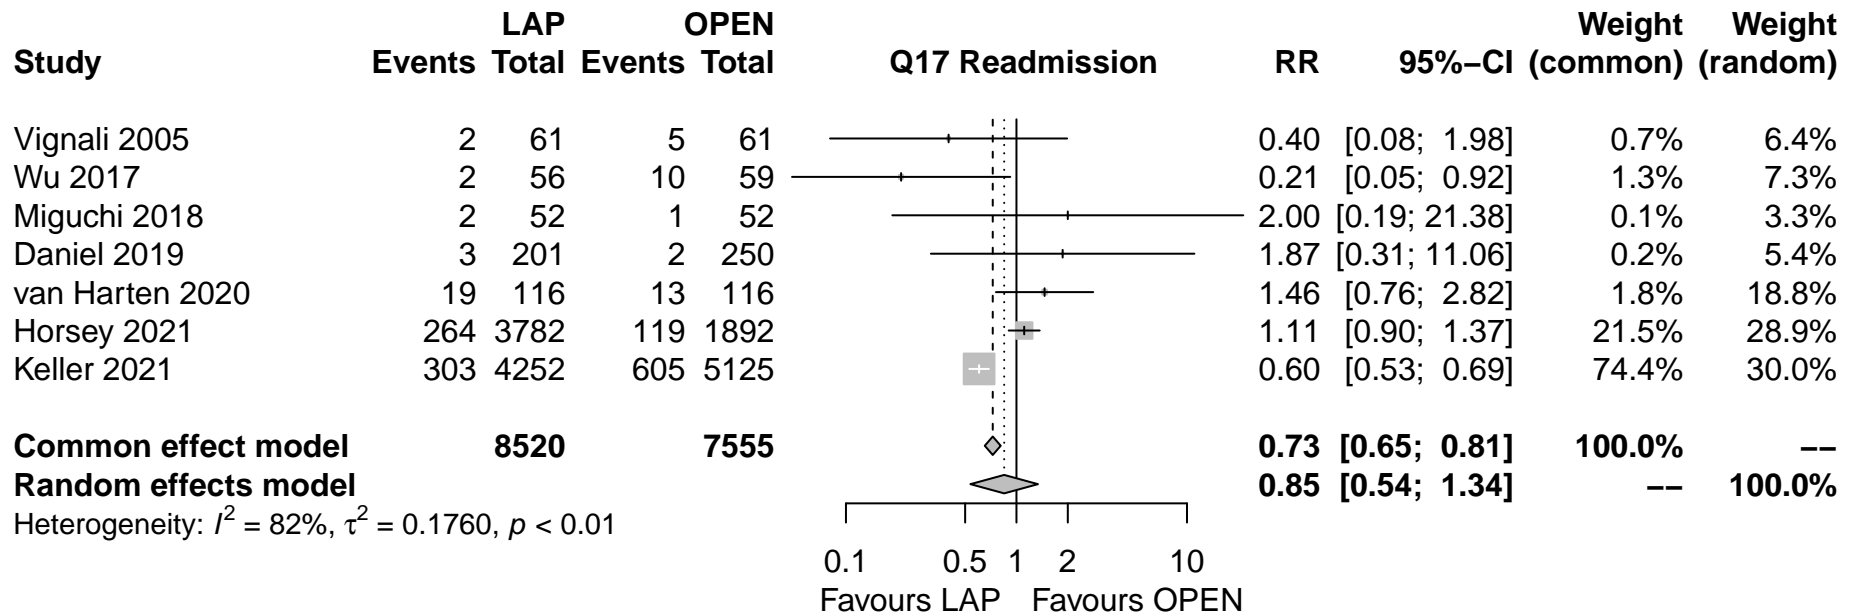

Q18 Complications

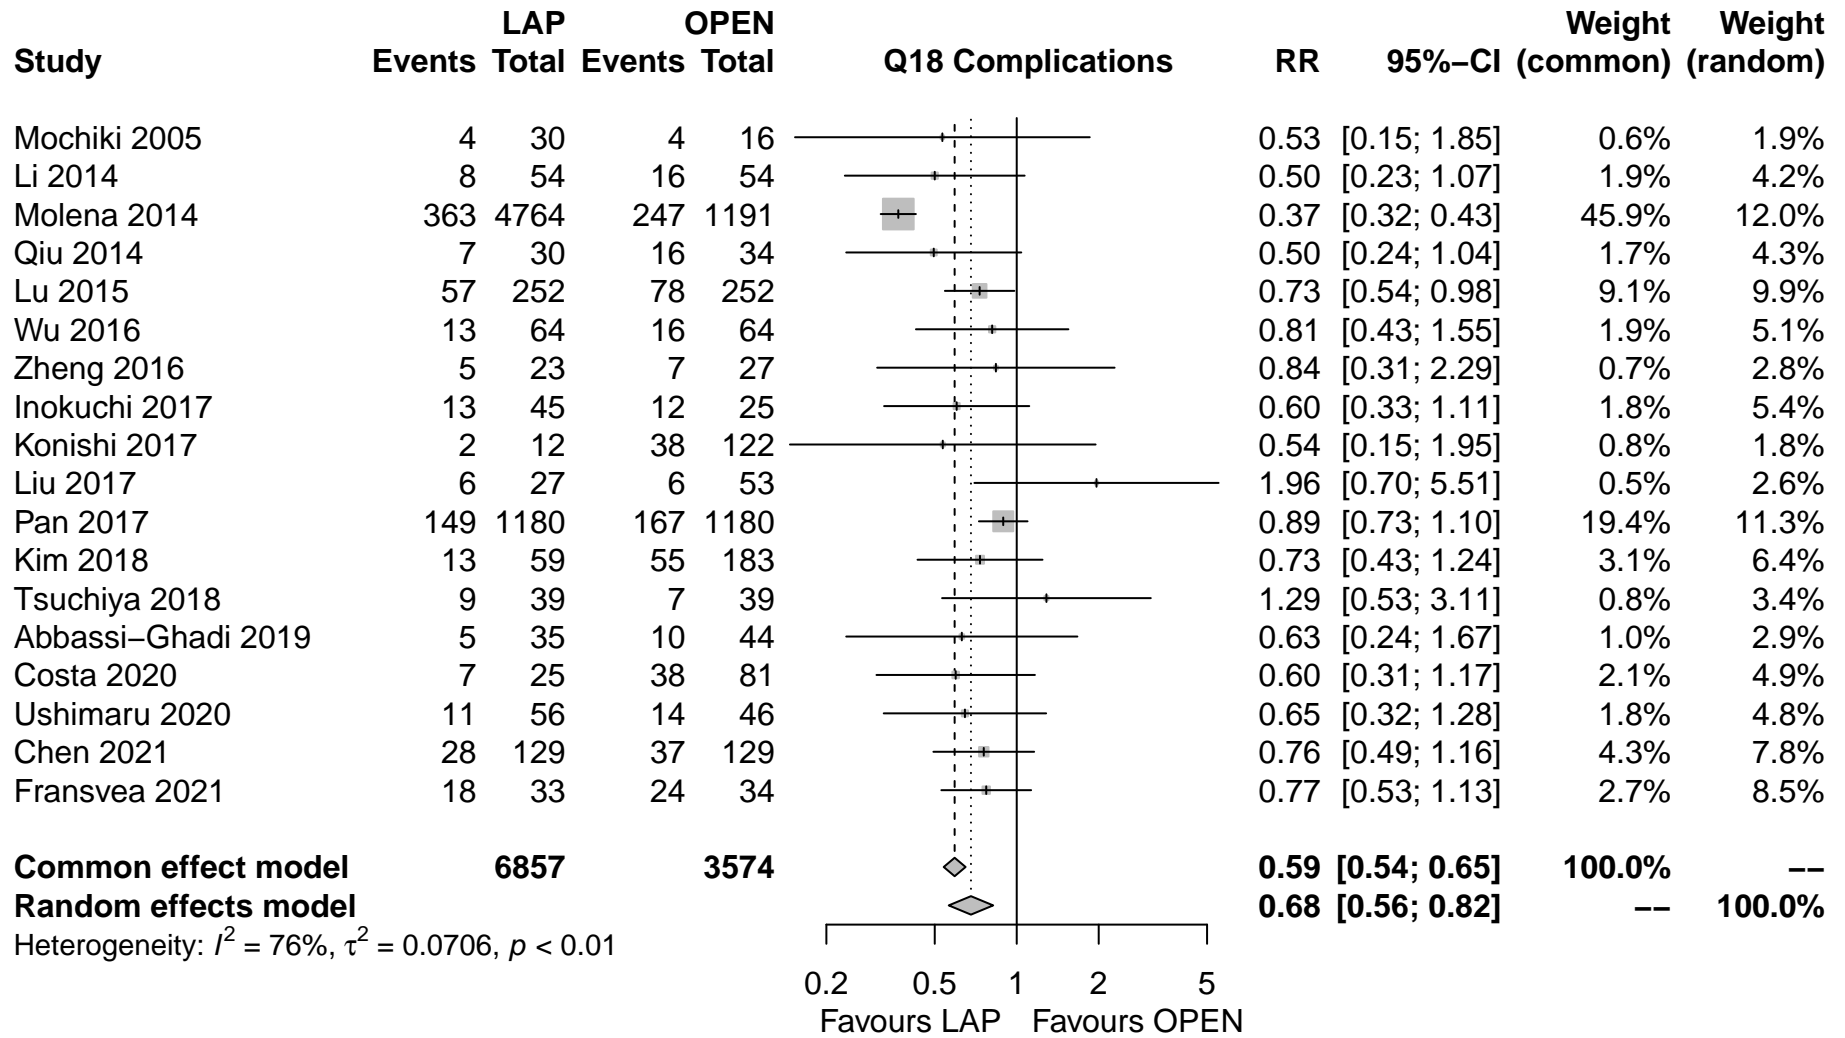

Q18 Complications - Subgroups

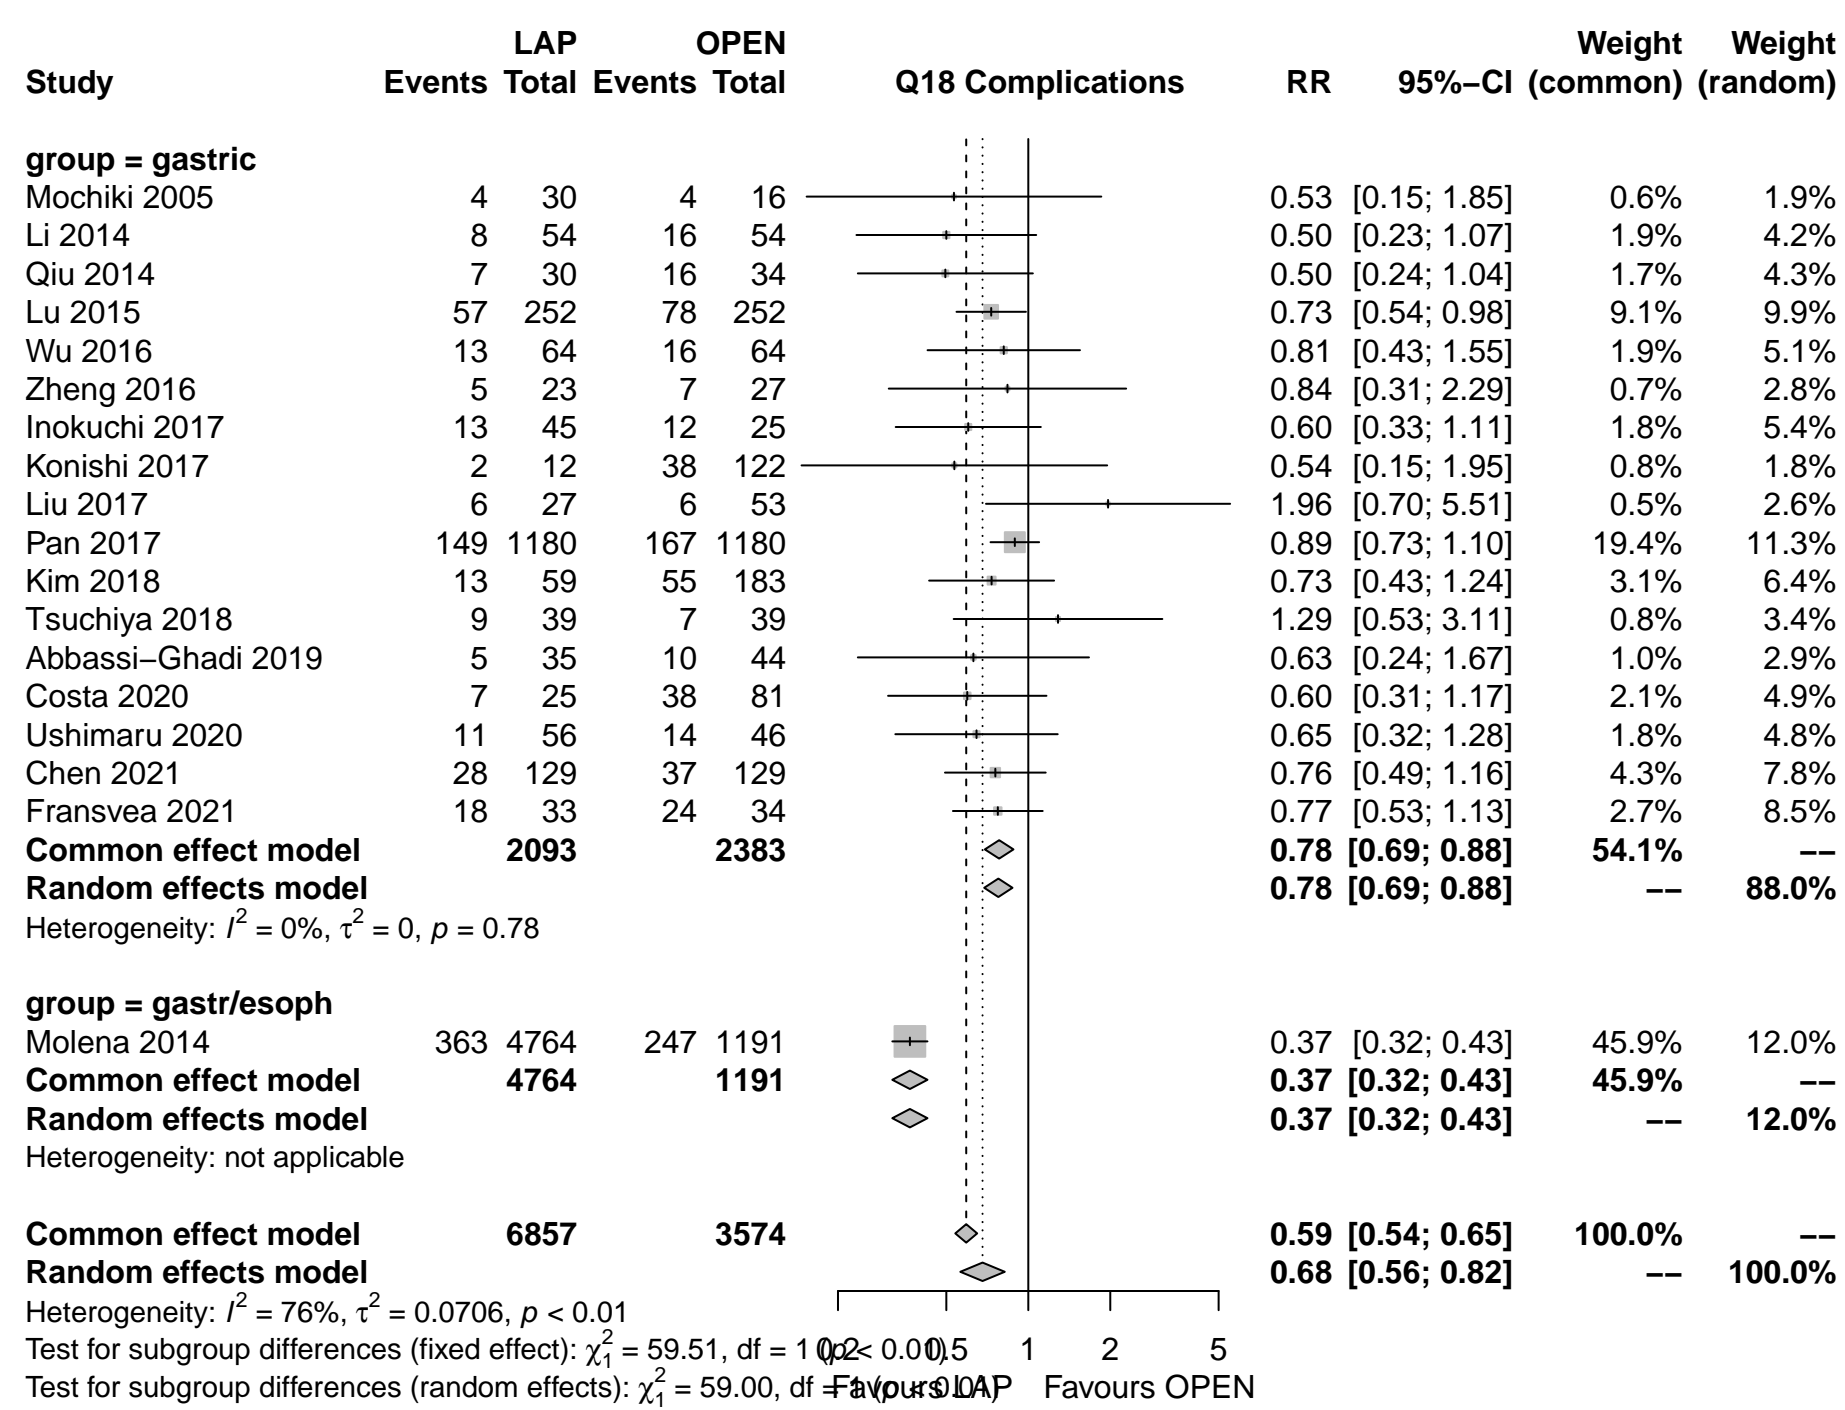

Q18 Length of stay

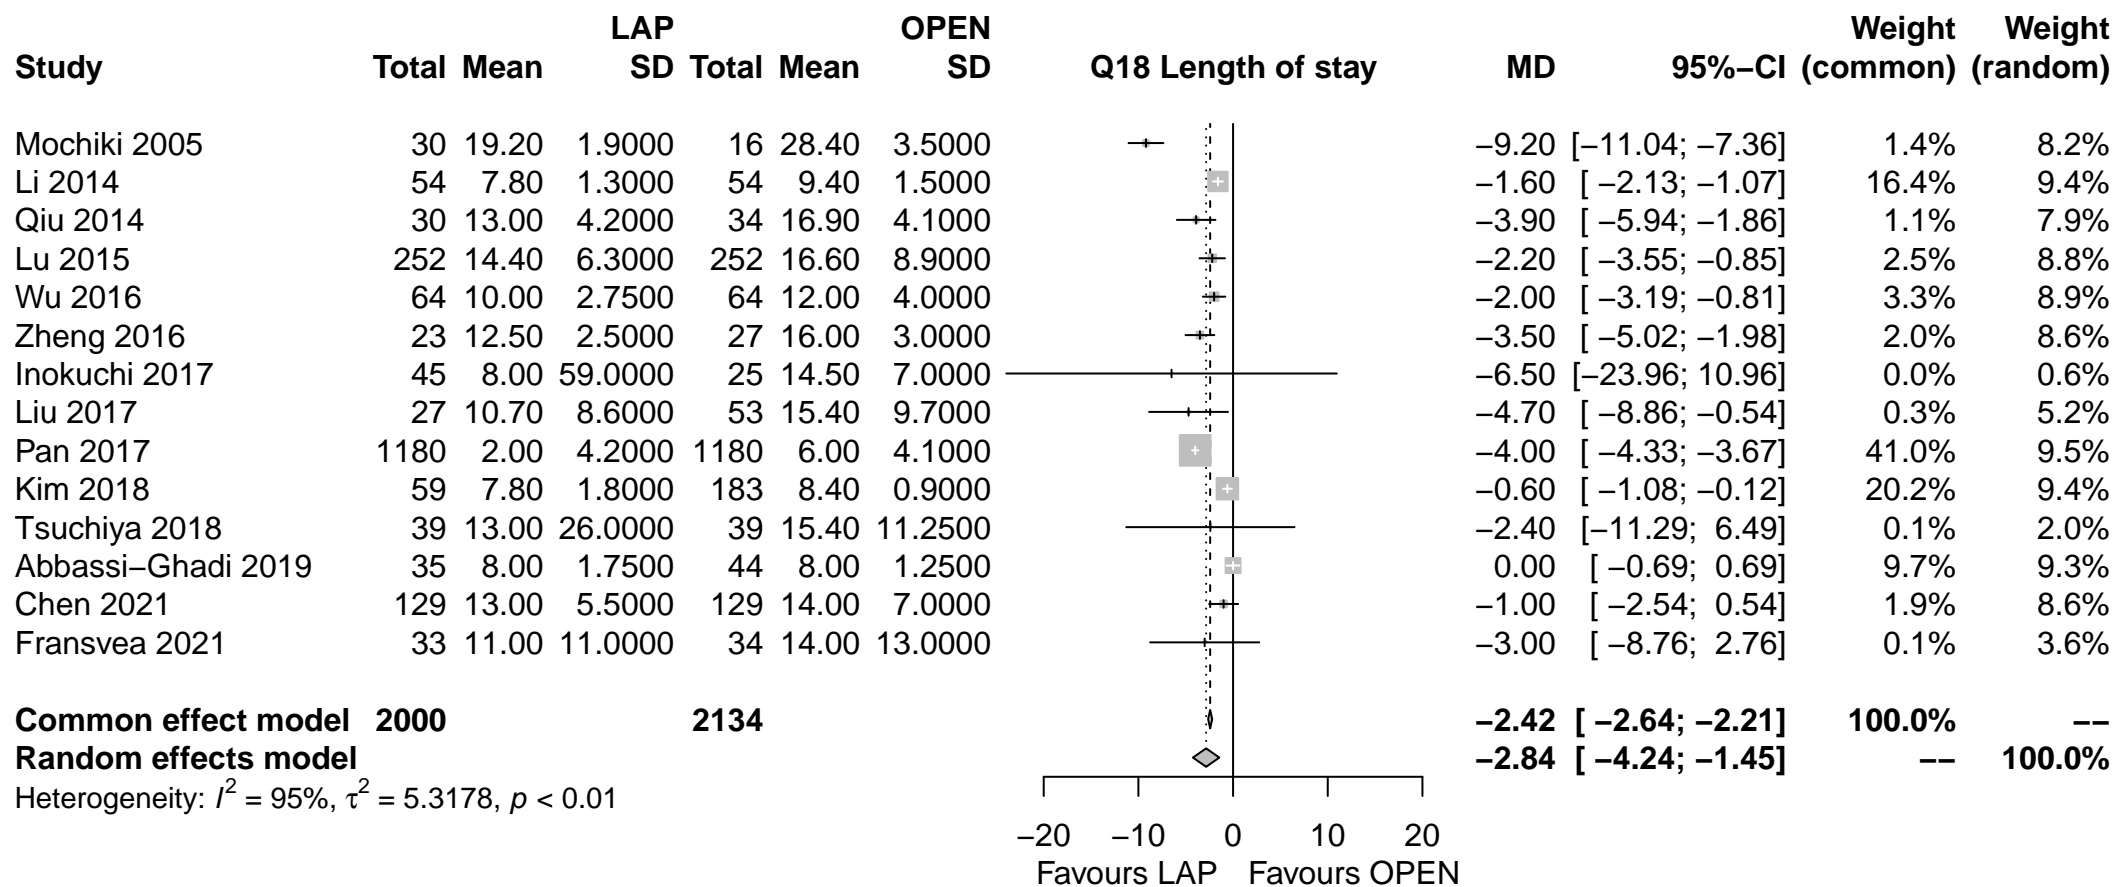



Q18 Length of stay - Subgroups

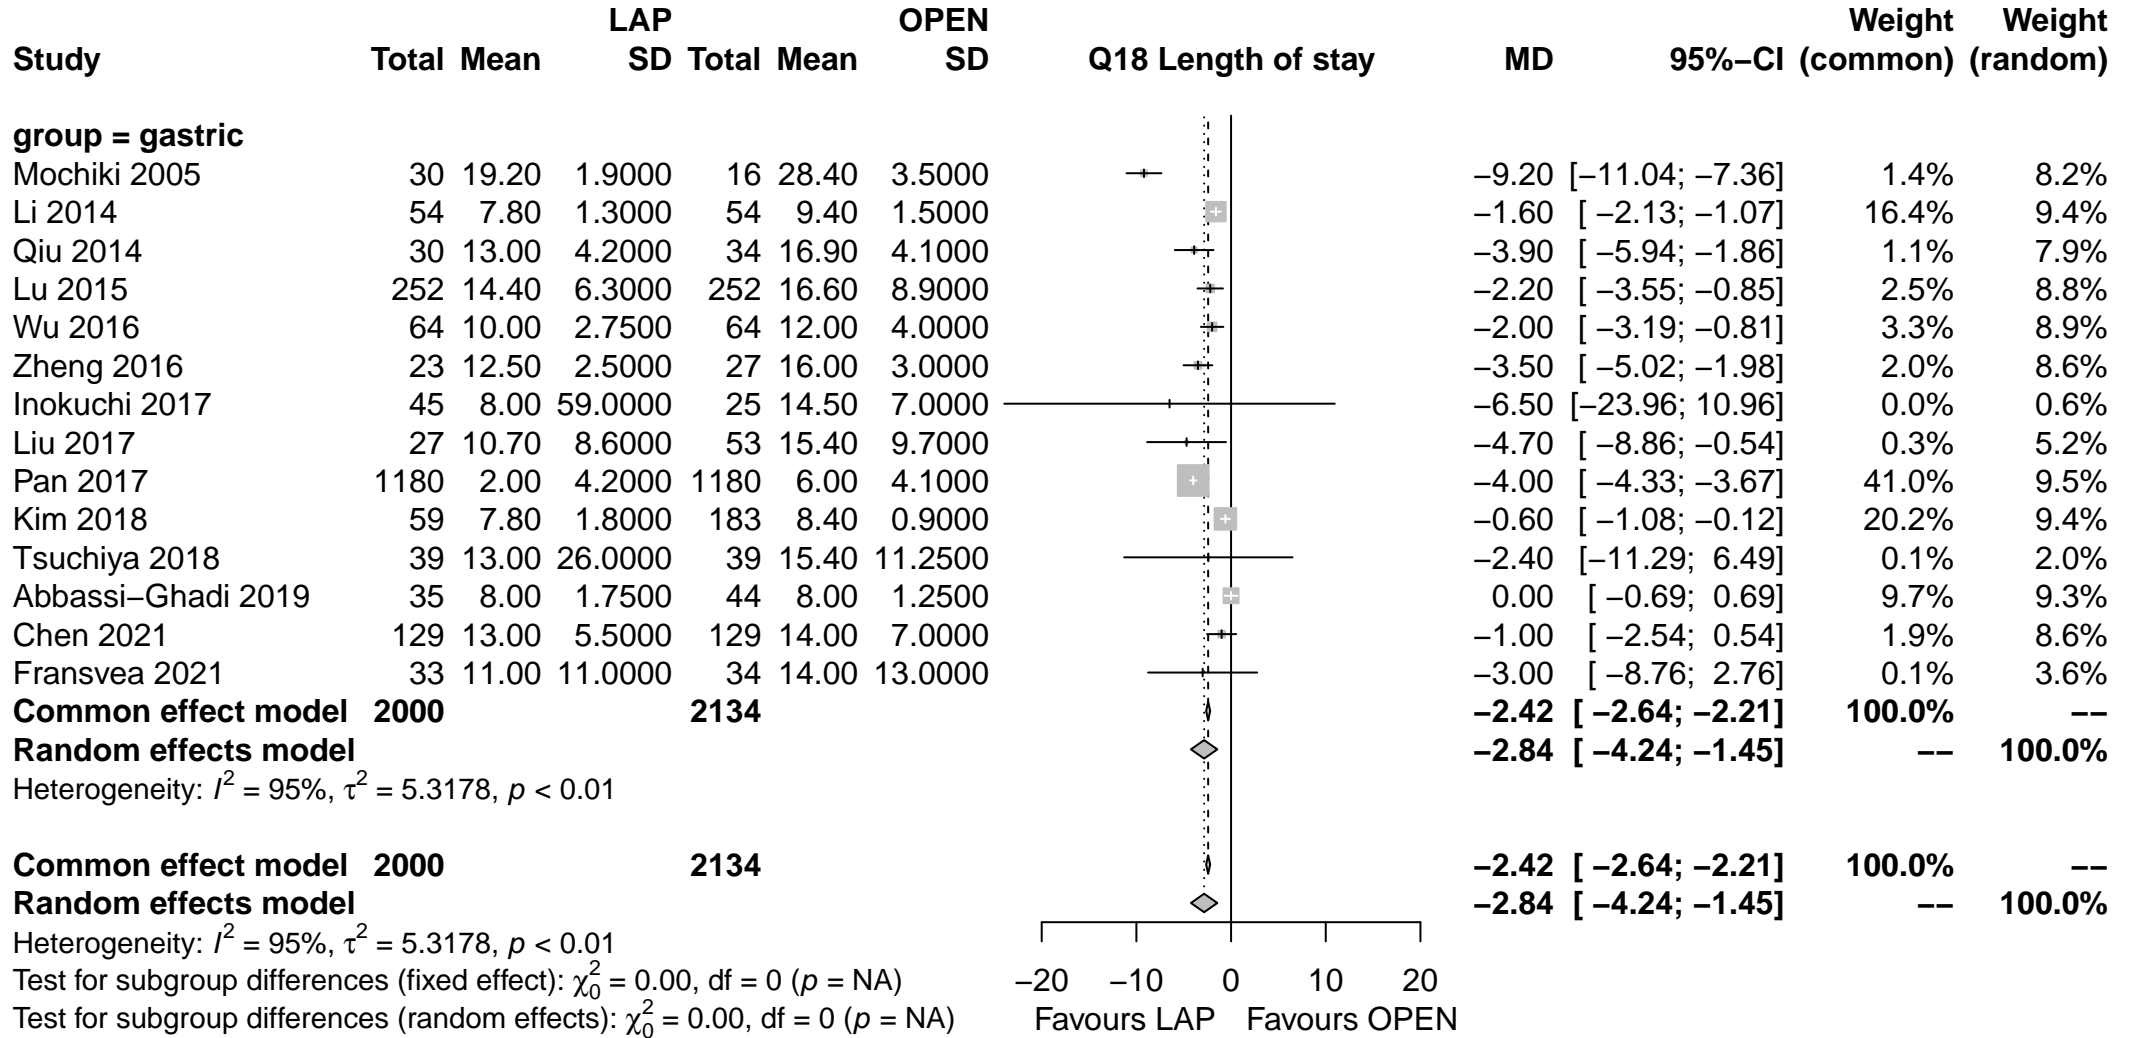

Q18 Readmission

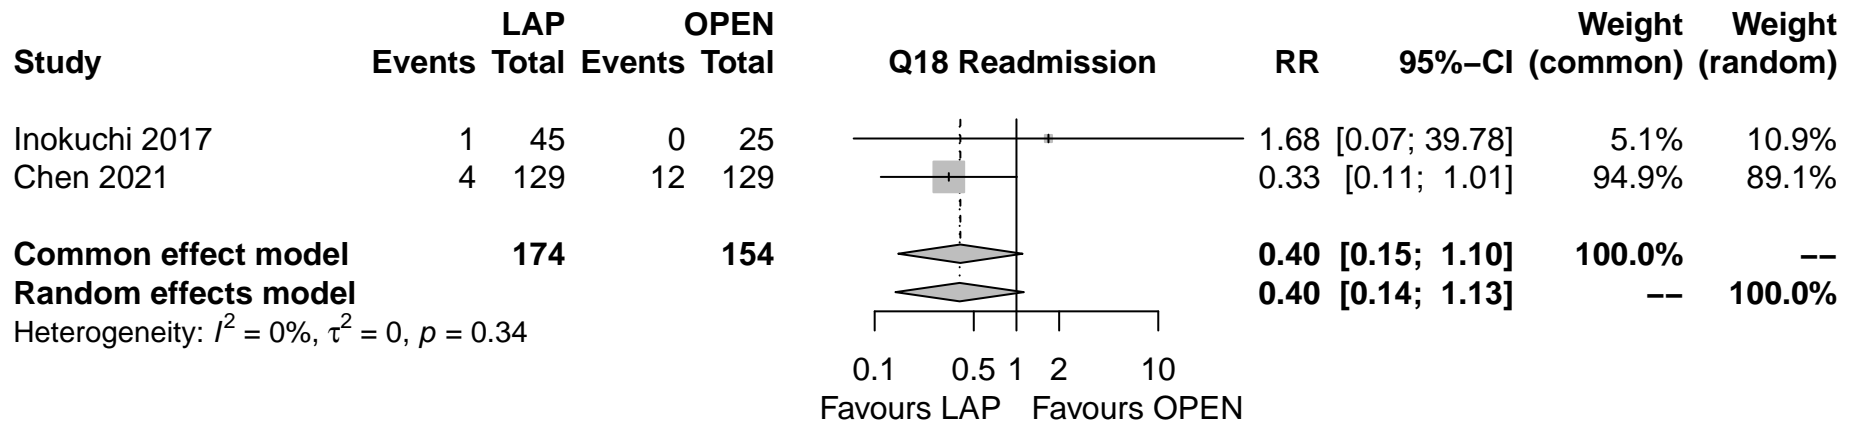

Q18 Readmission - Subgroups

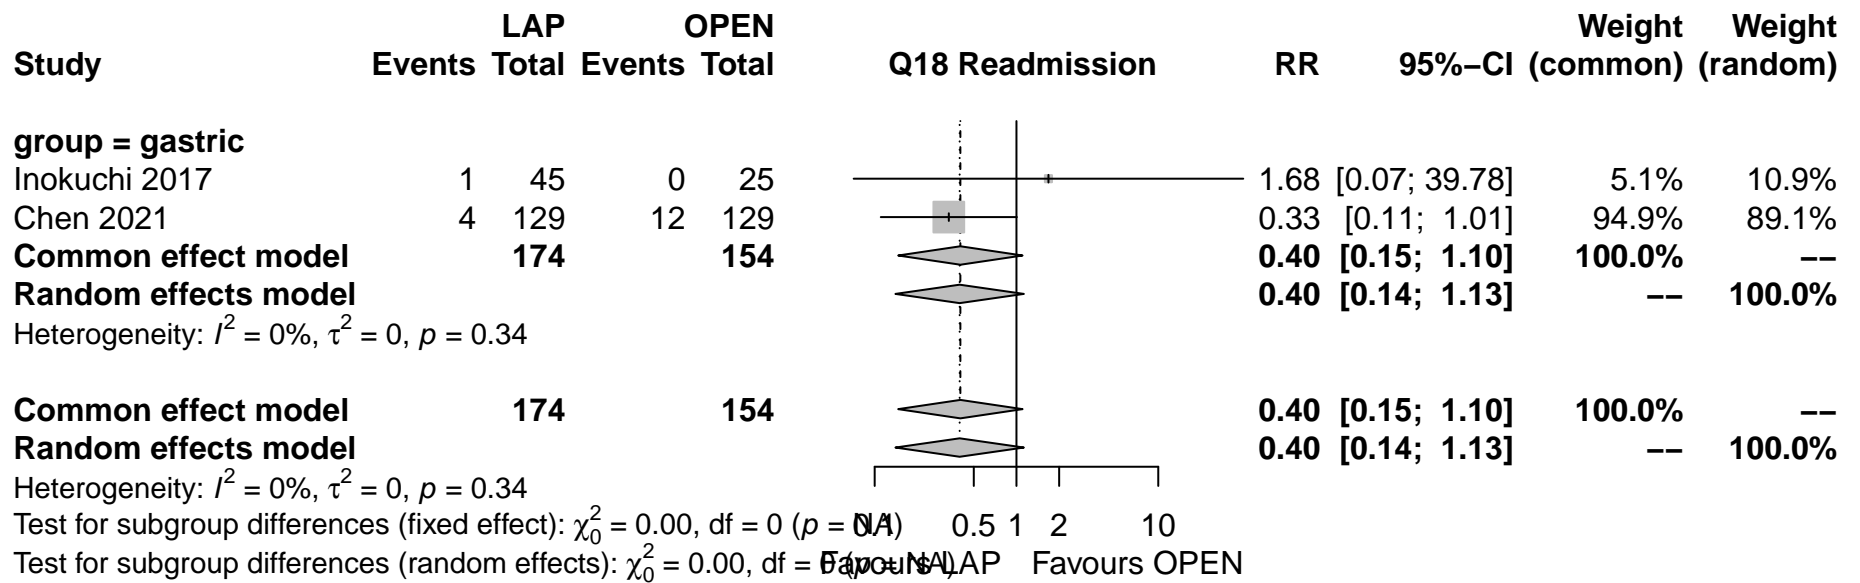

Q19 Complications

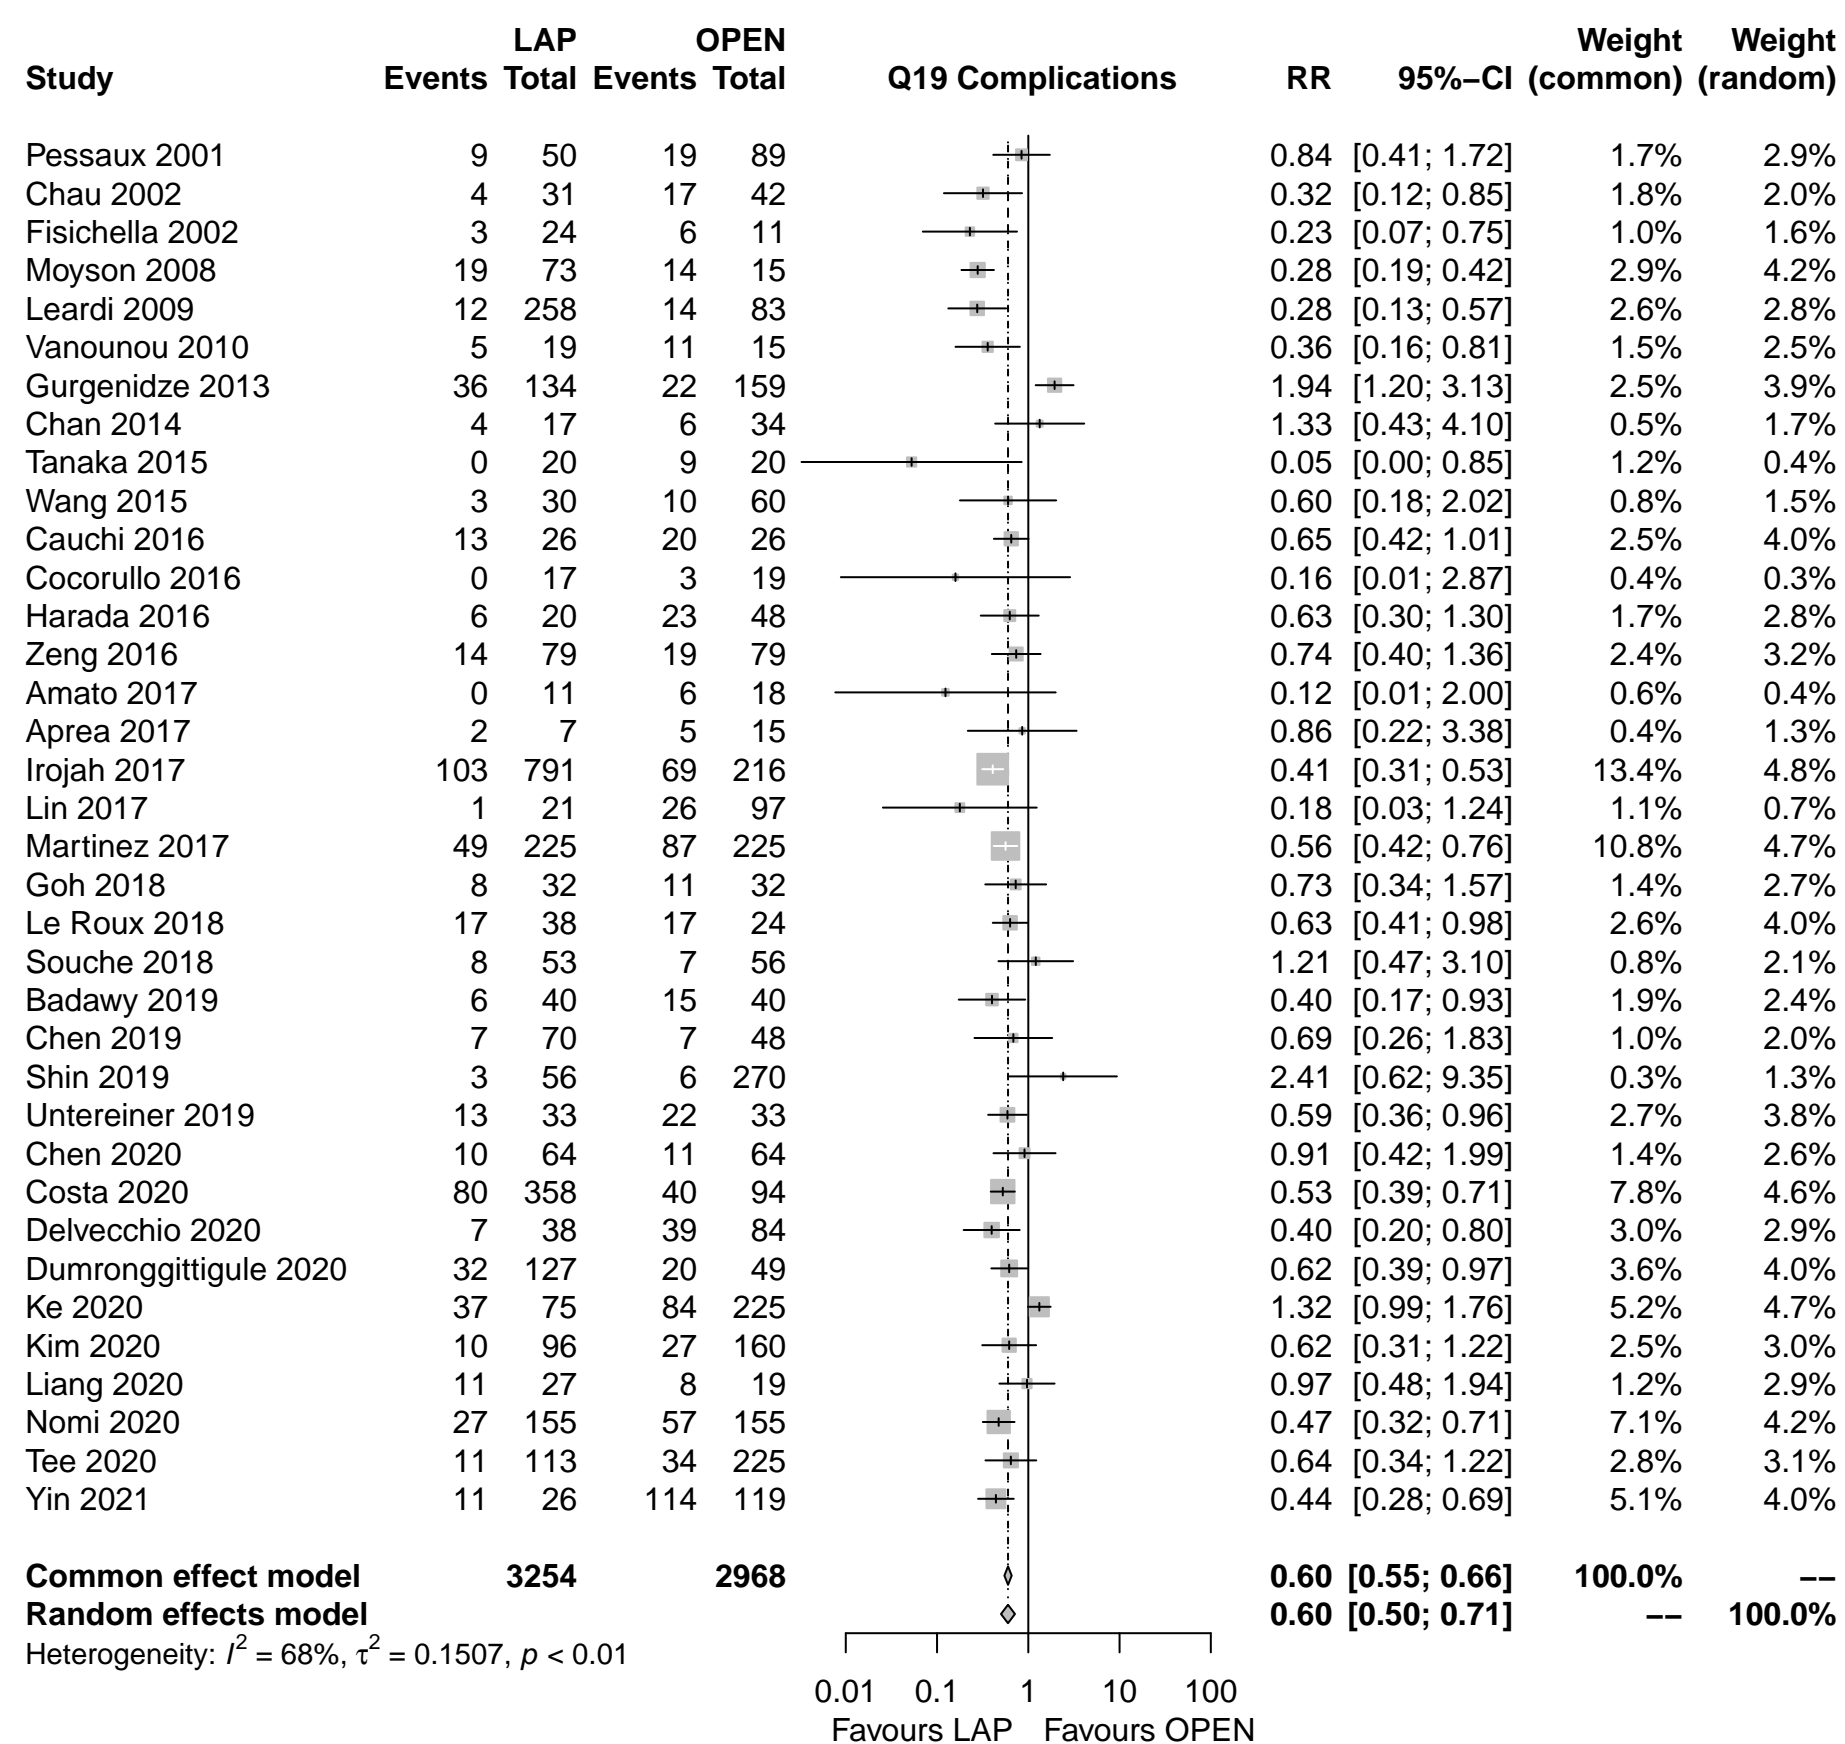

Q19 Complications - Subgroups

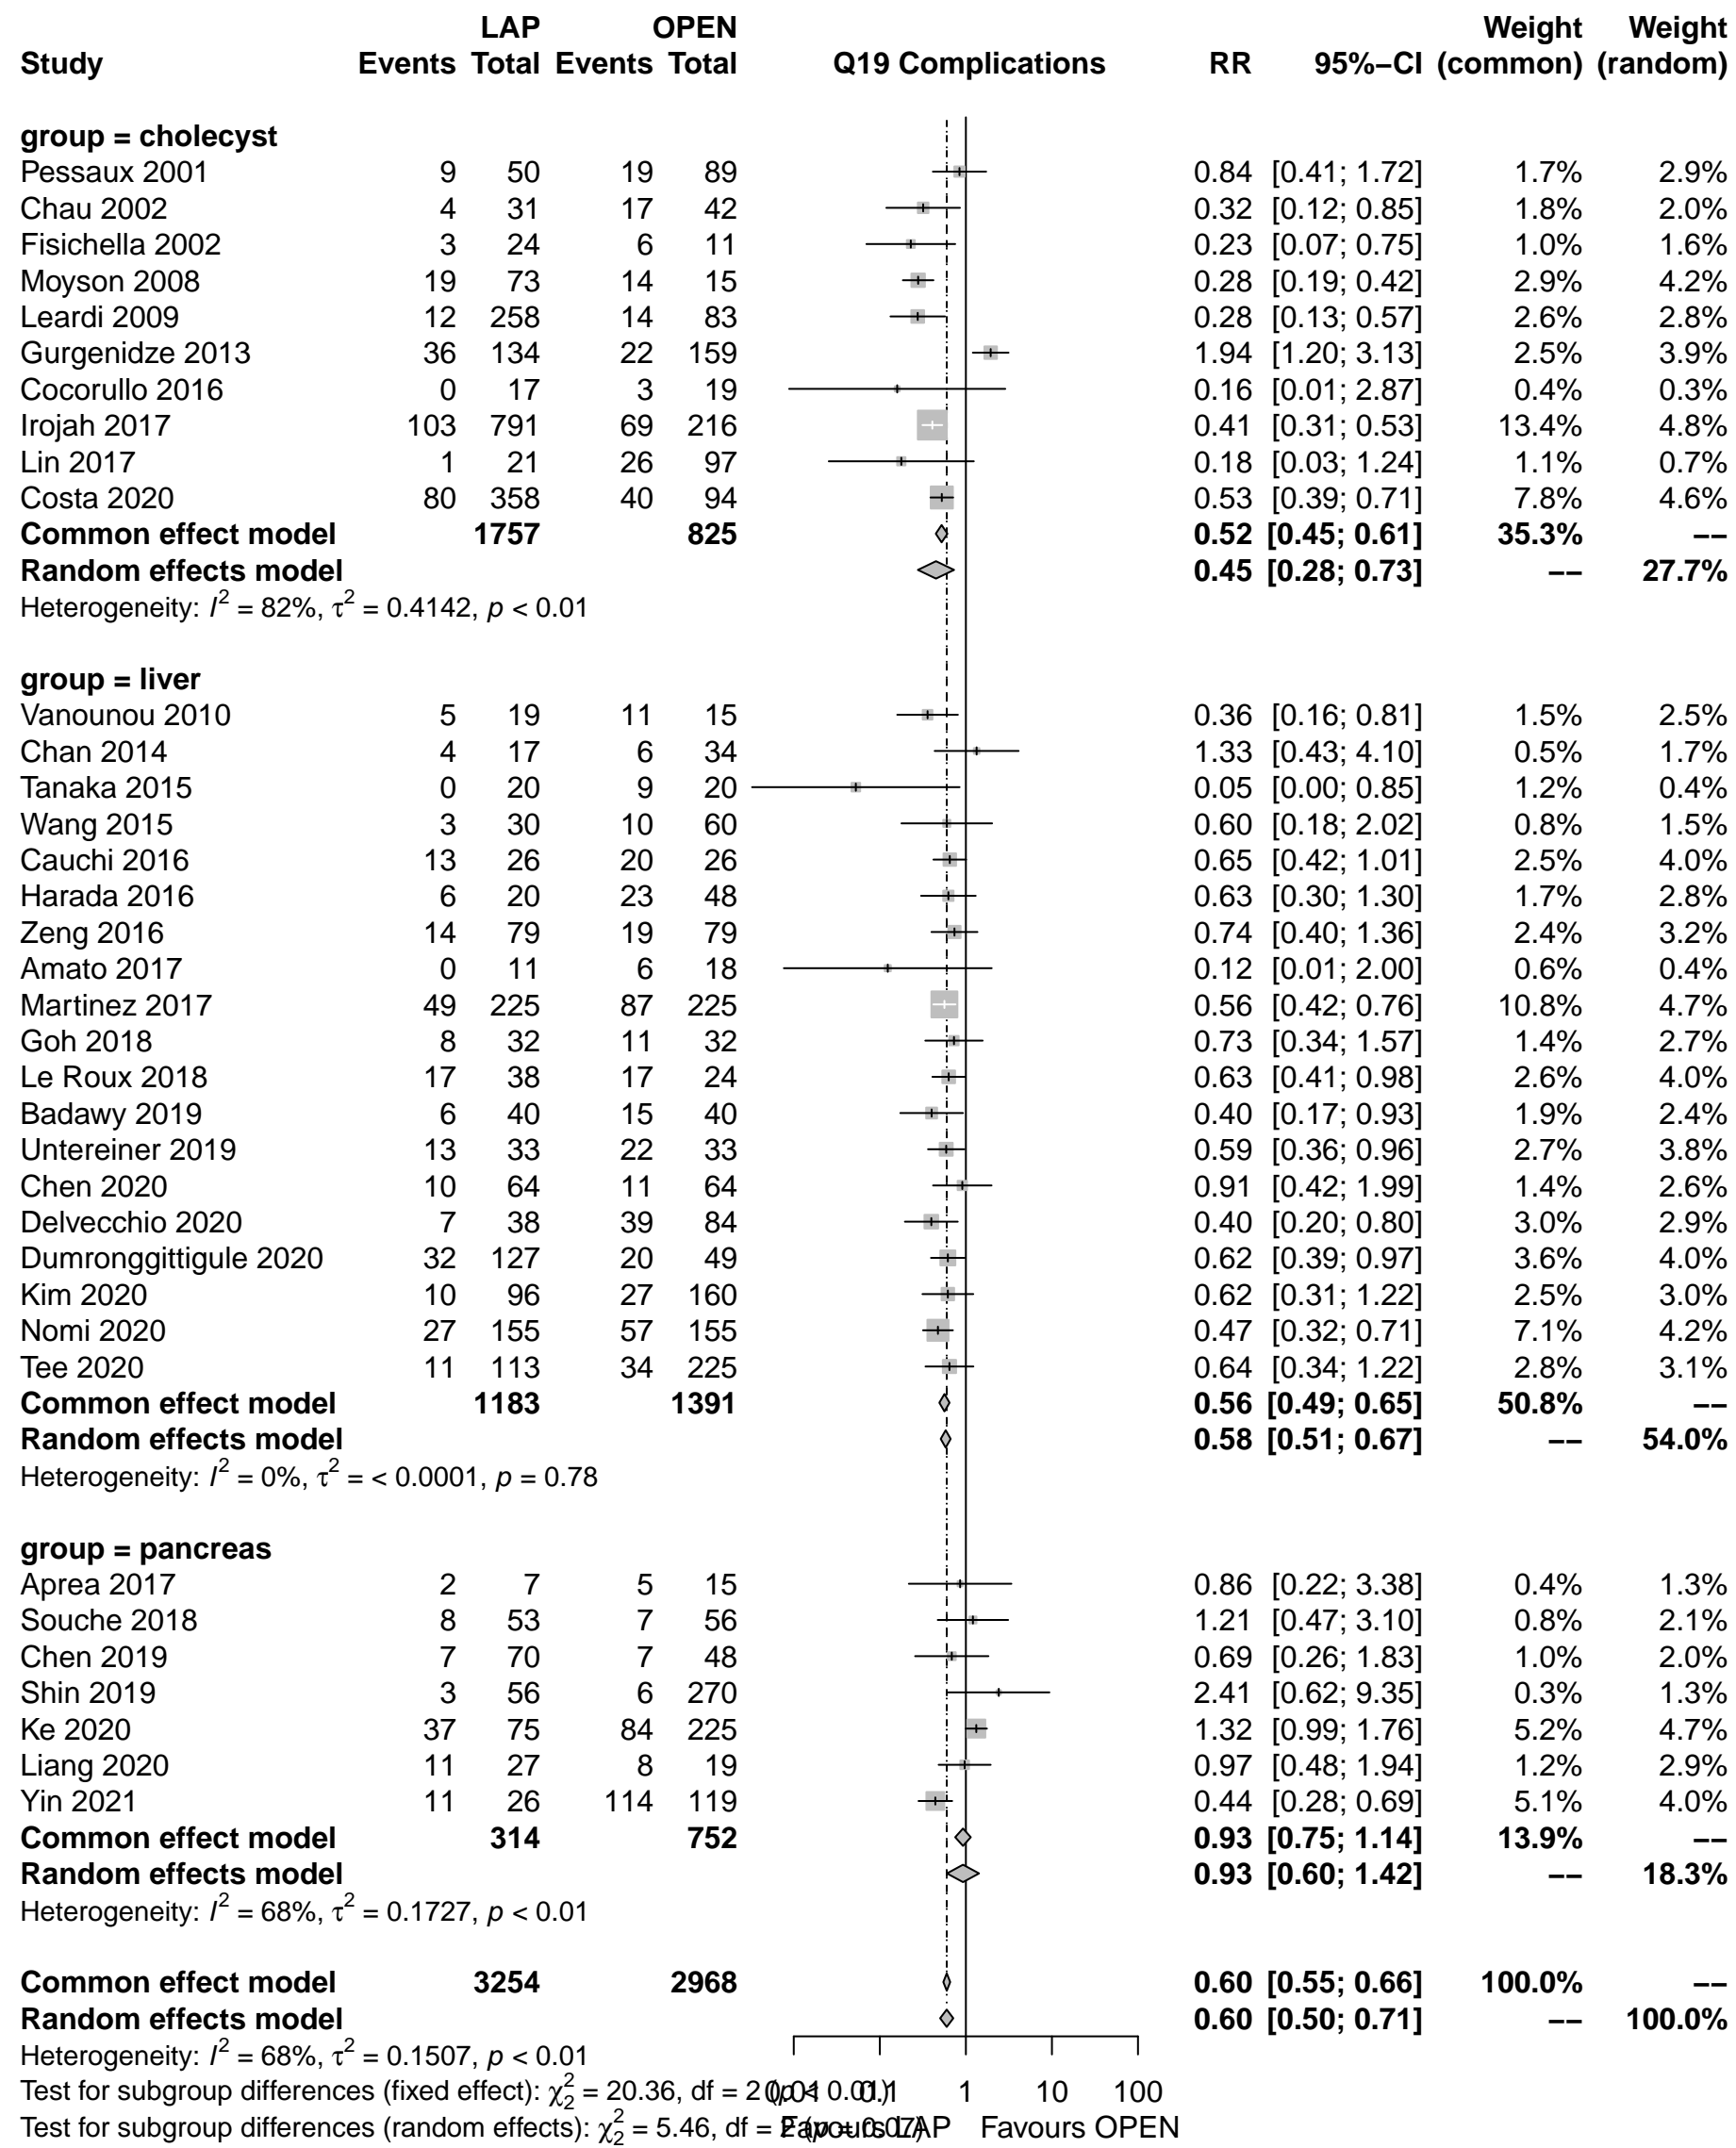

Q19 Length of stay

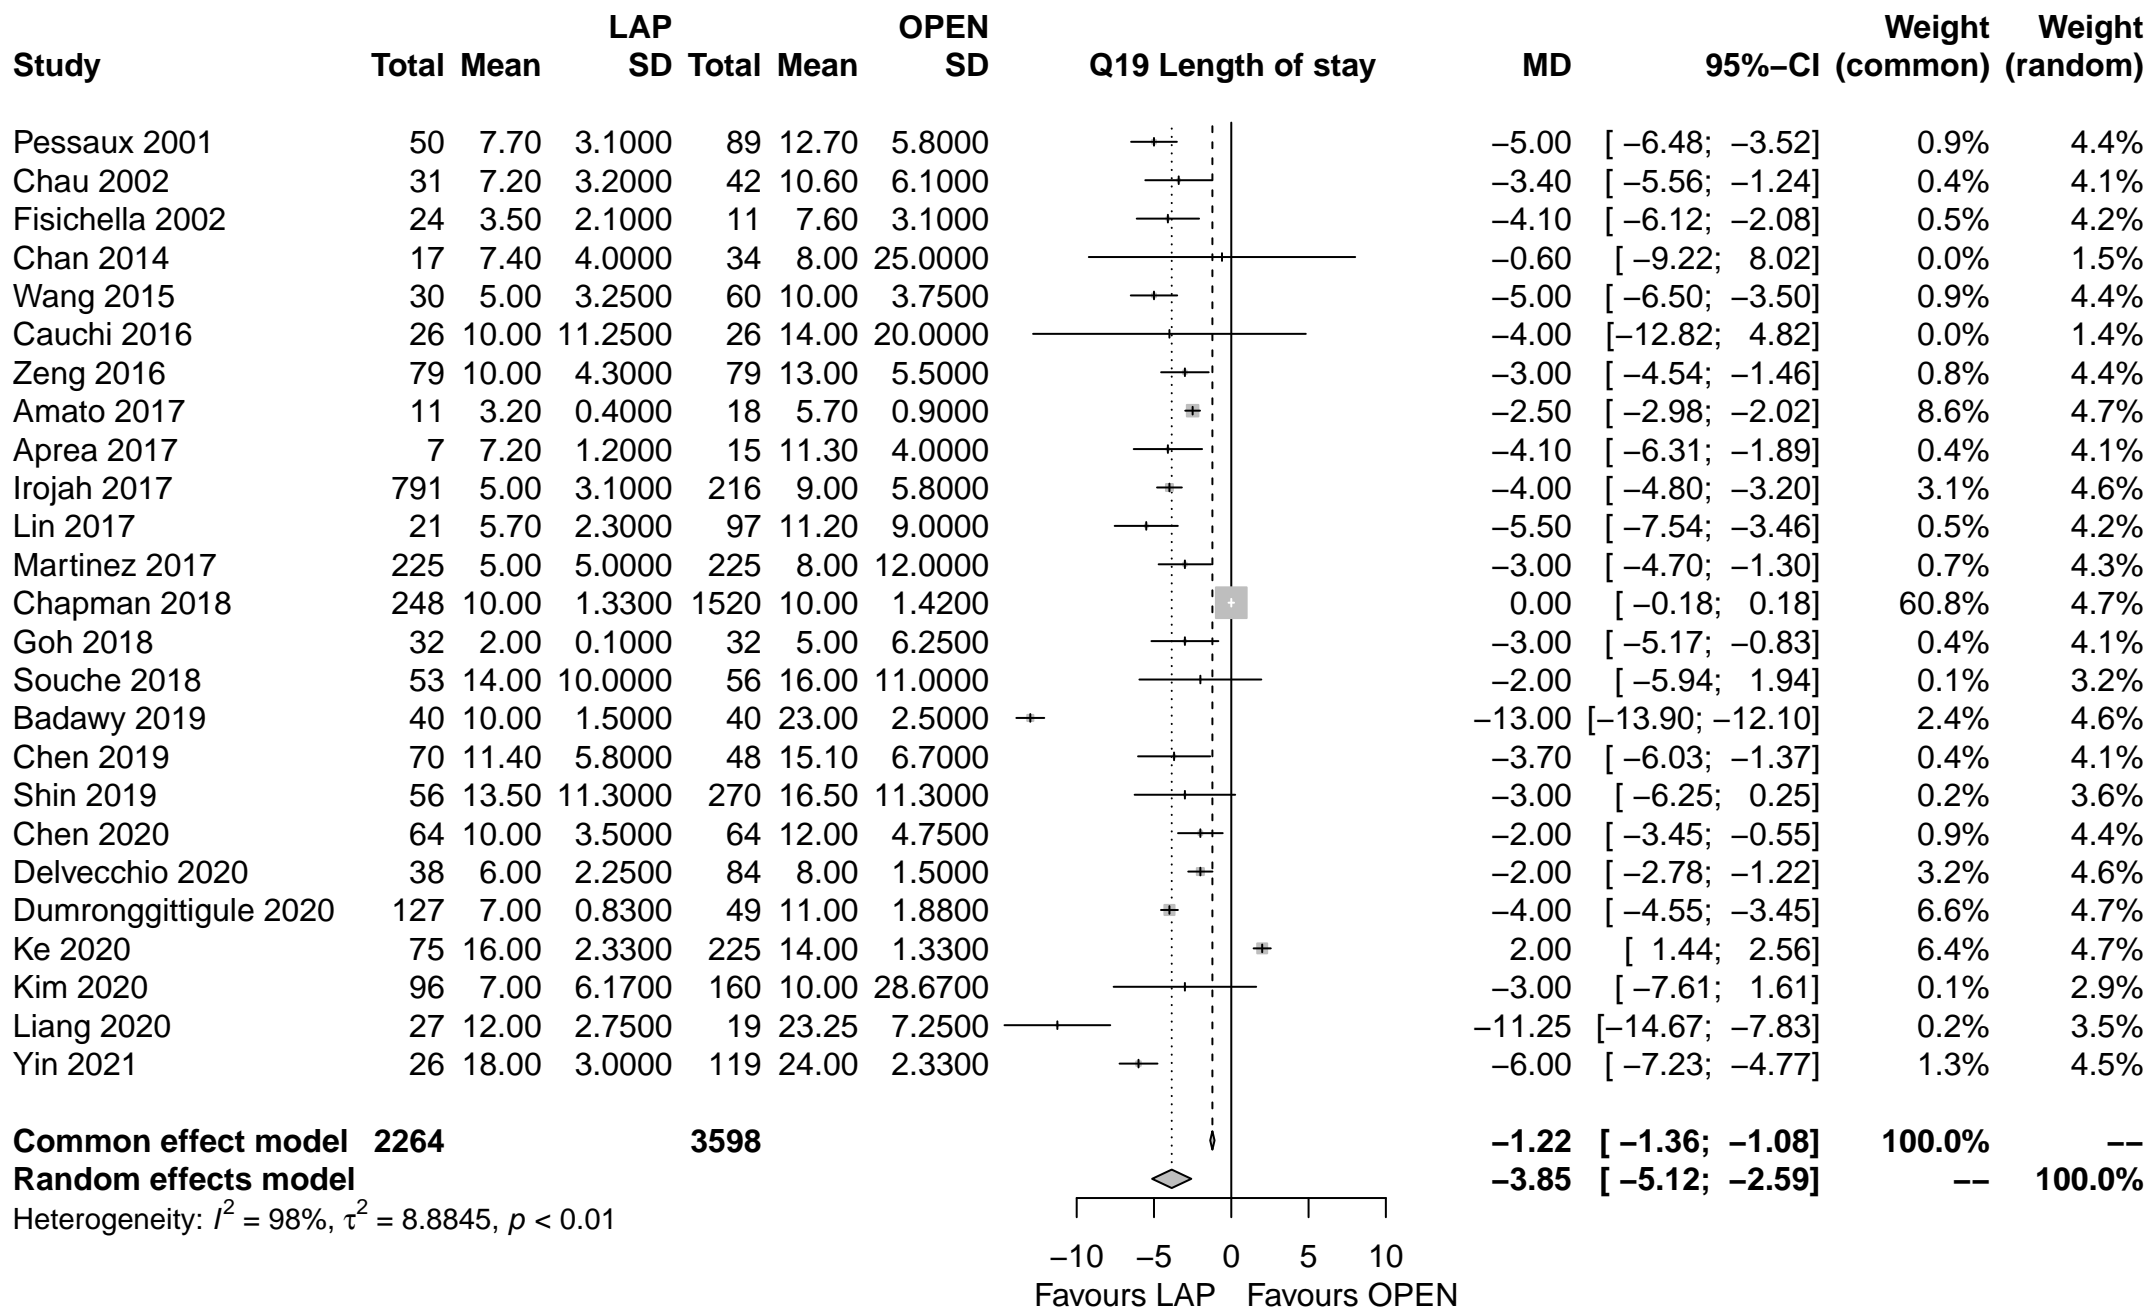

Q19 Length of stay - Subgroups

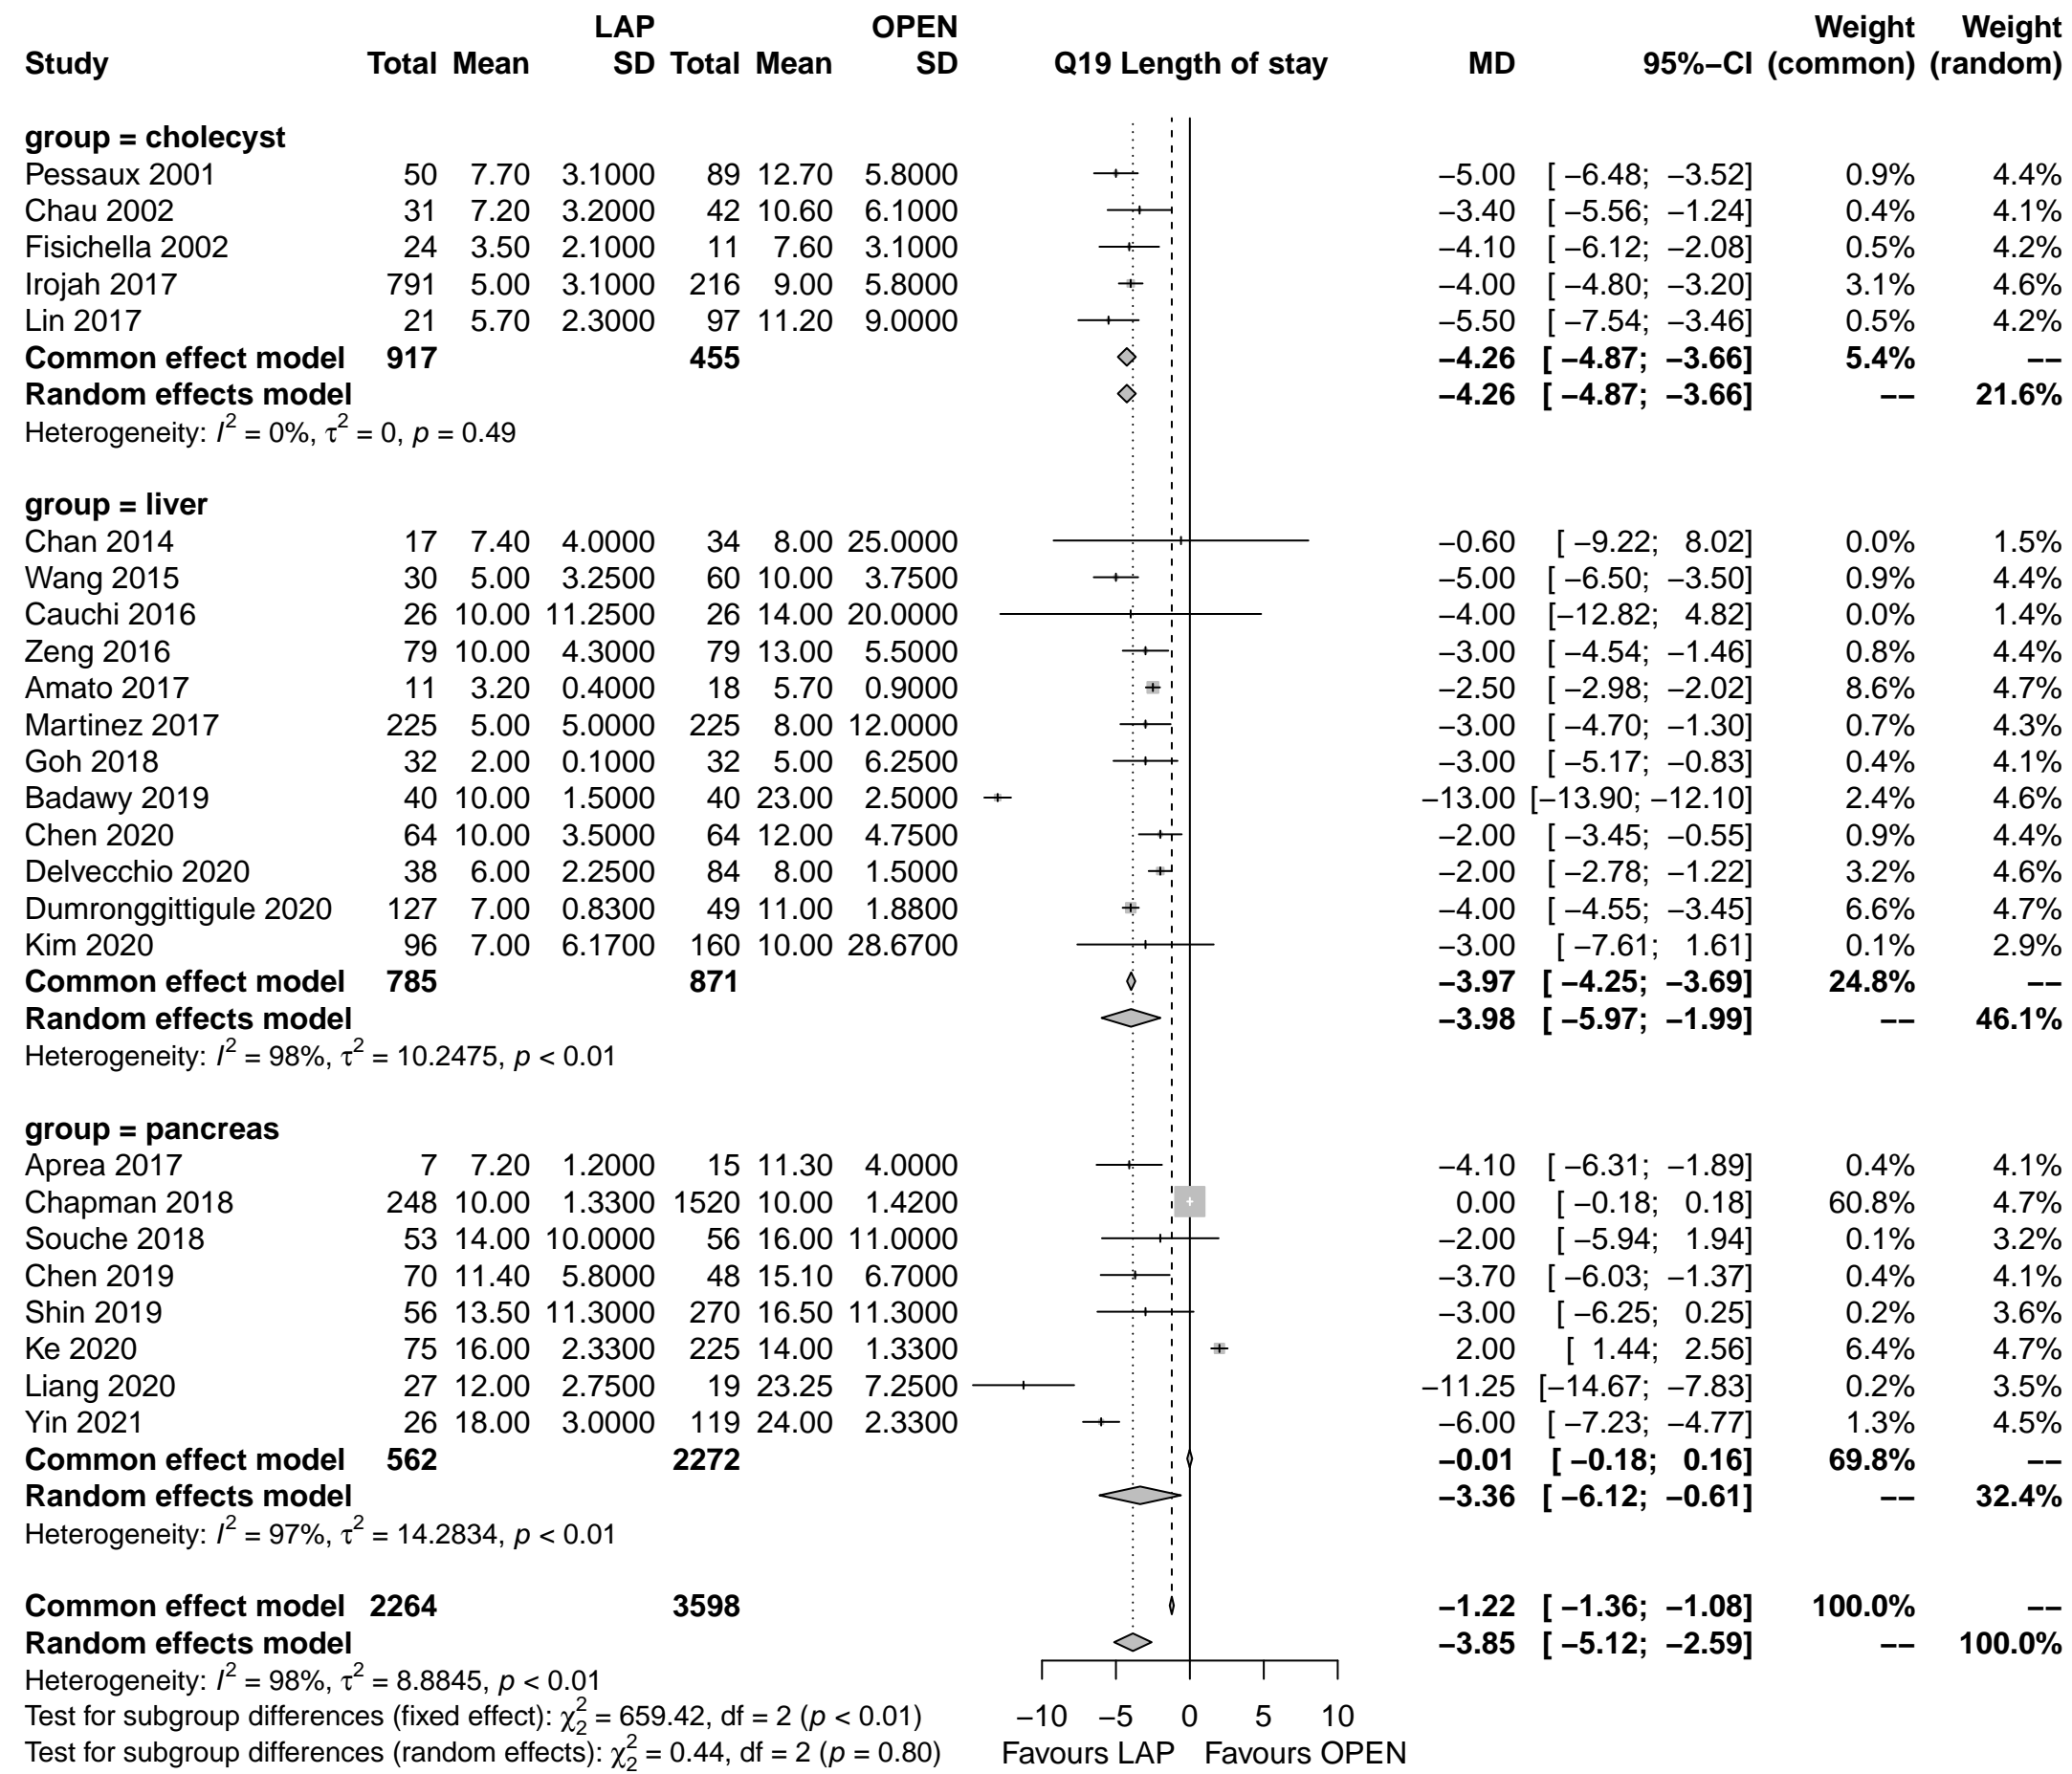

Q19 Readmission

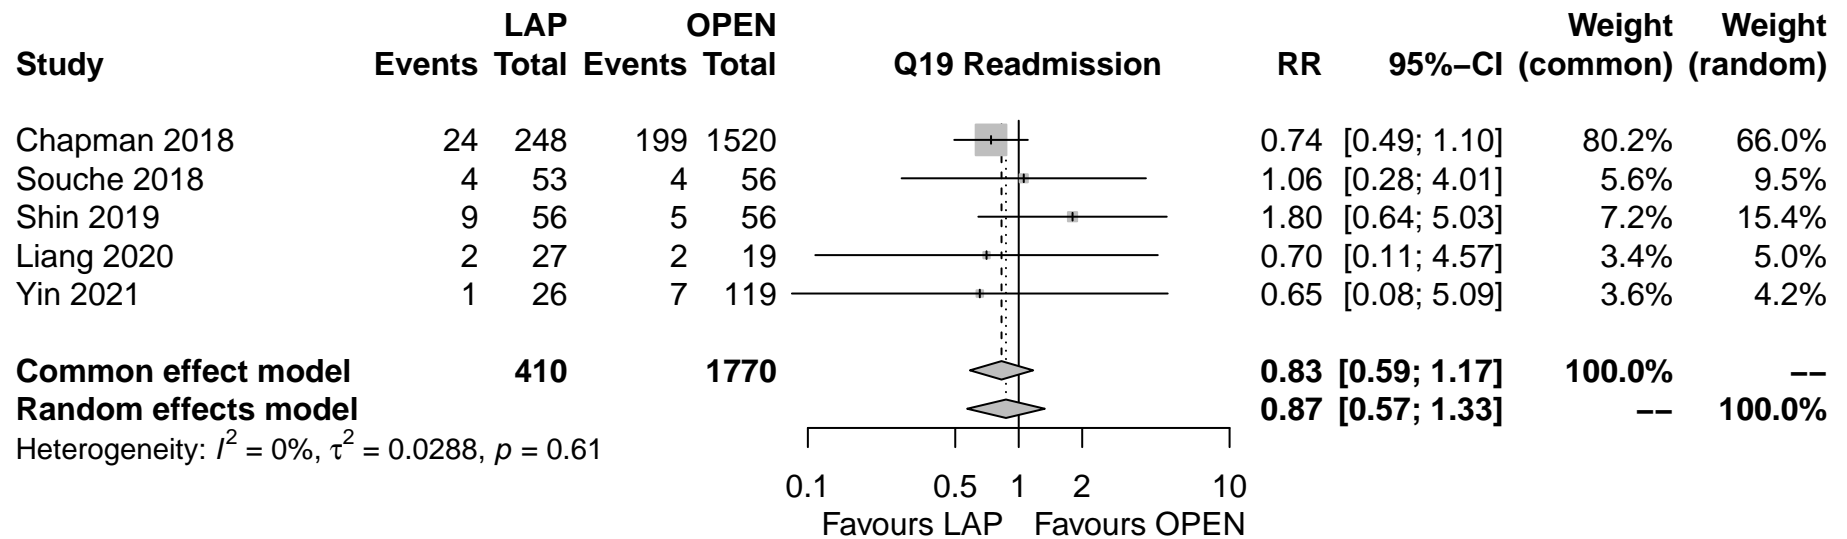



Q19 Readmission - Subgroups

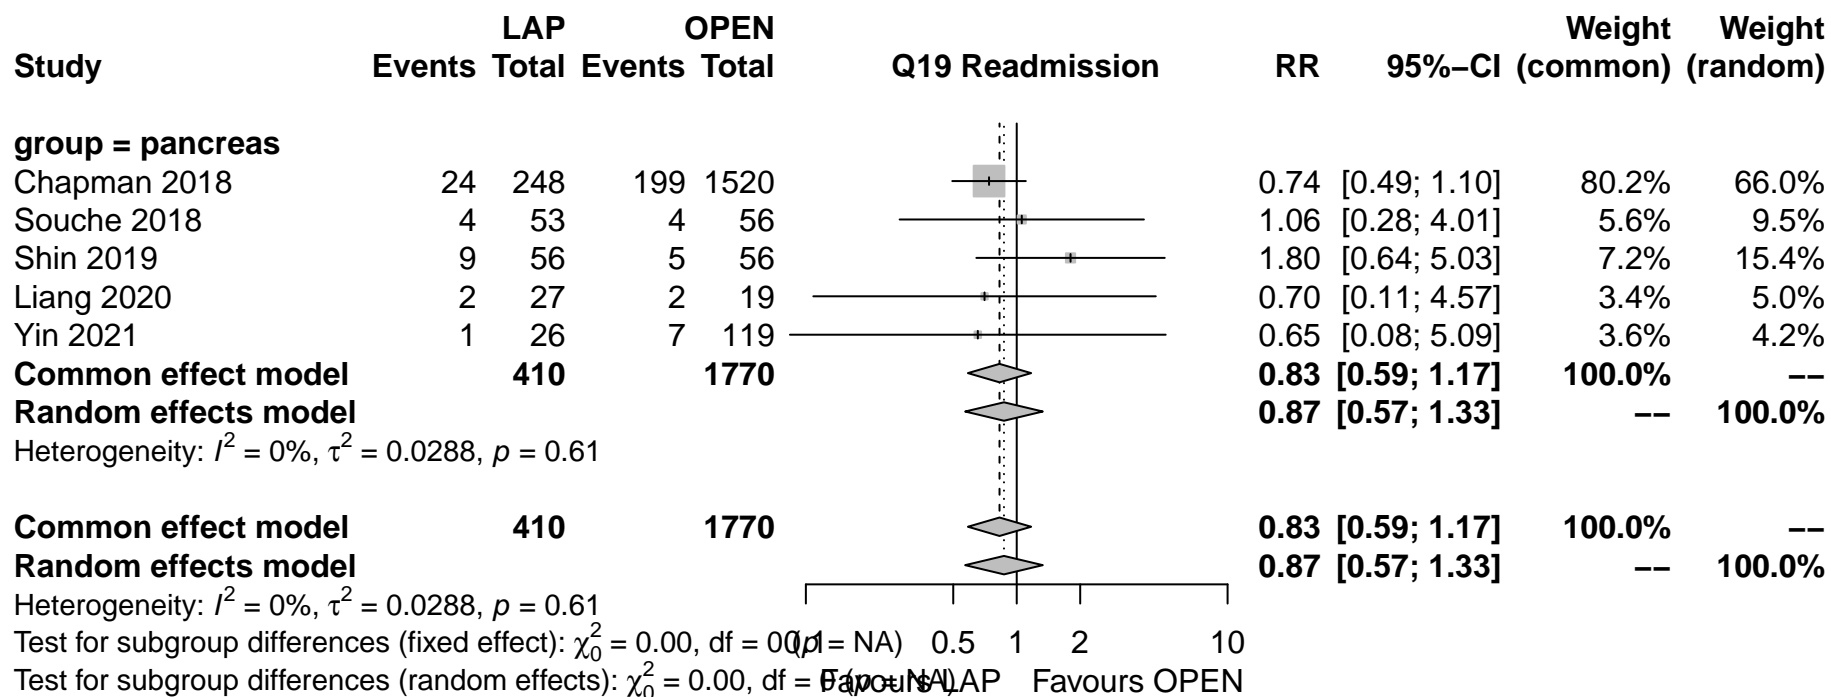

Q20 Complications

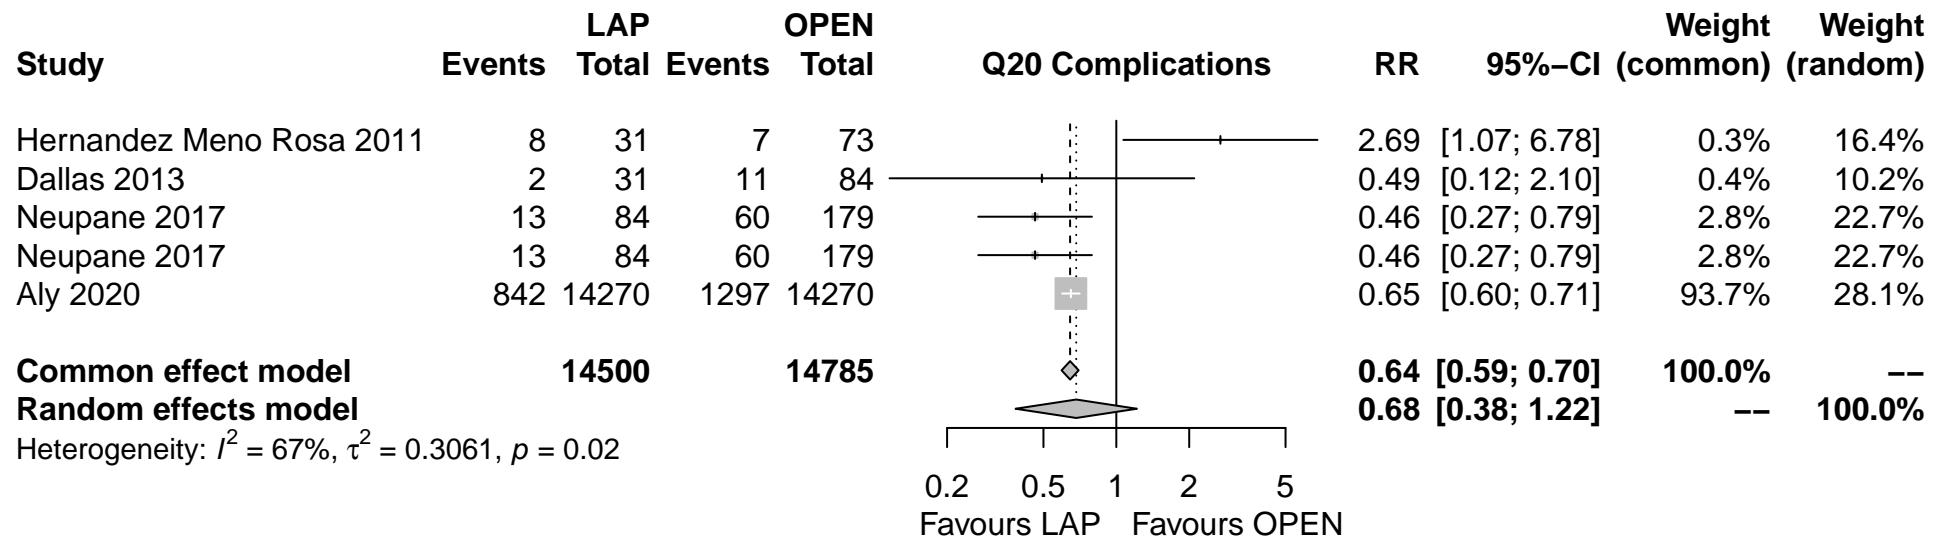

Q20 Complications - Subgroups

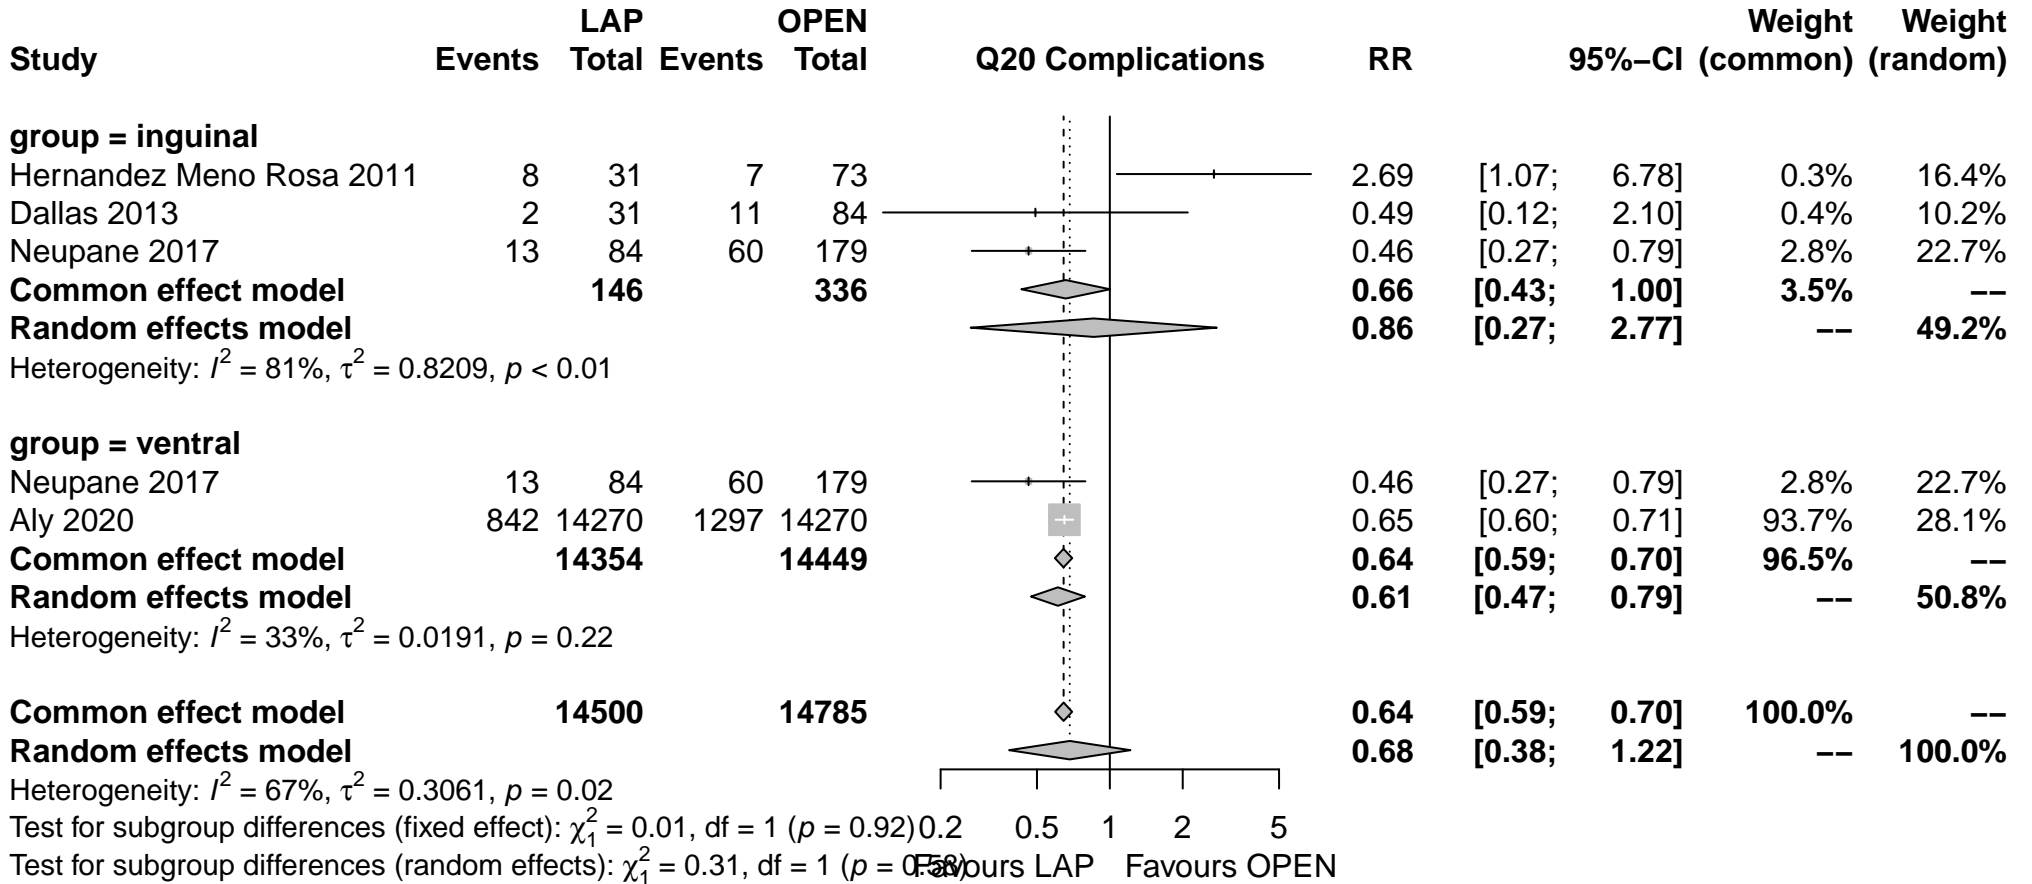

Q20 Length of stay

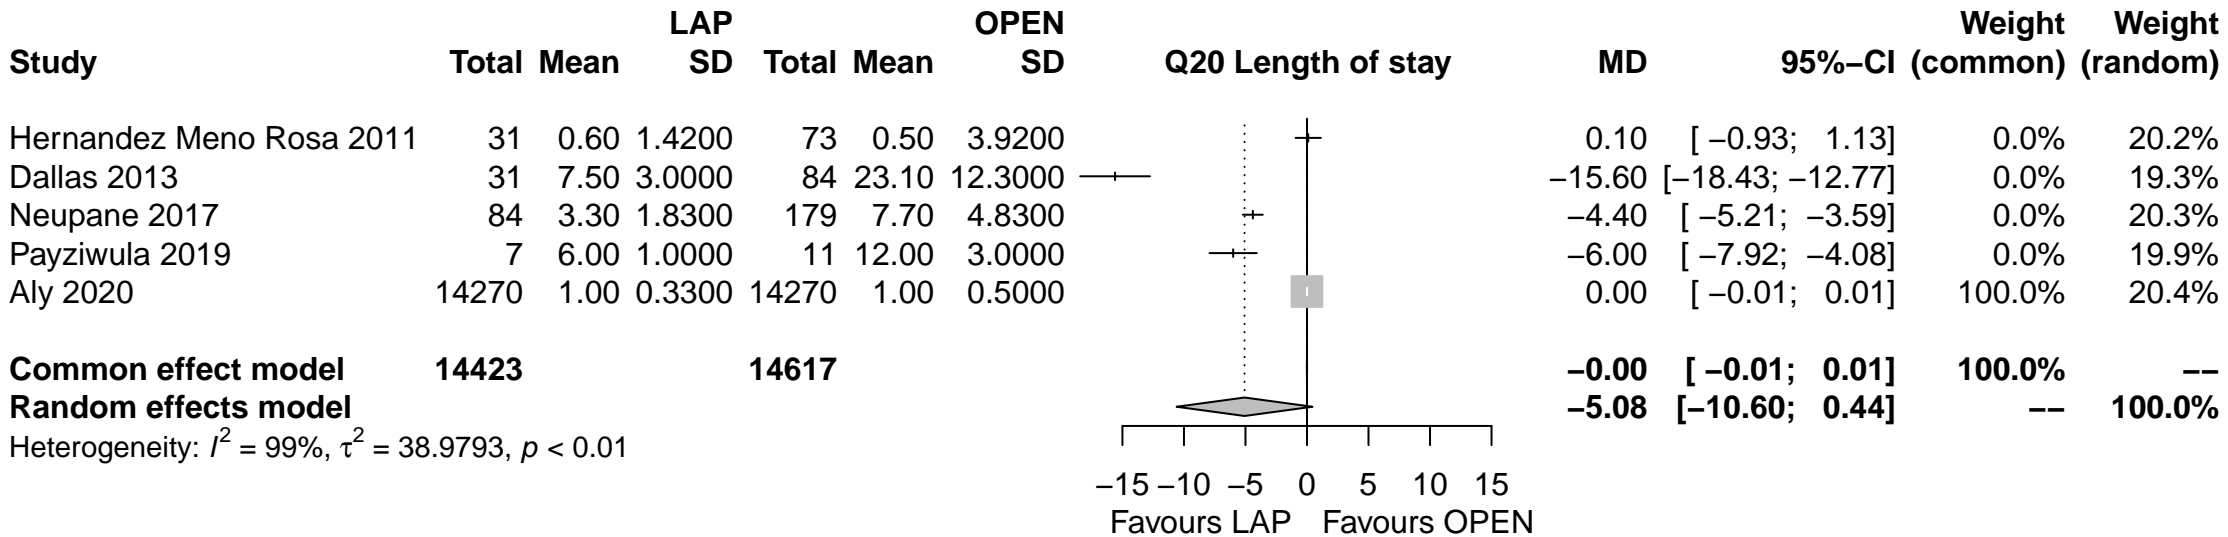

Q20 Length of stay - Subgroups

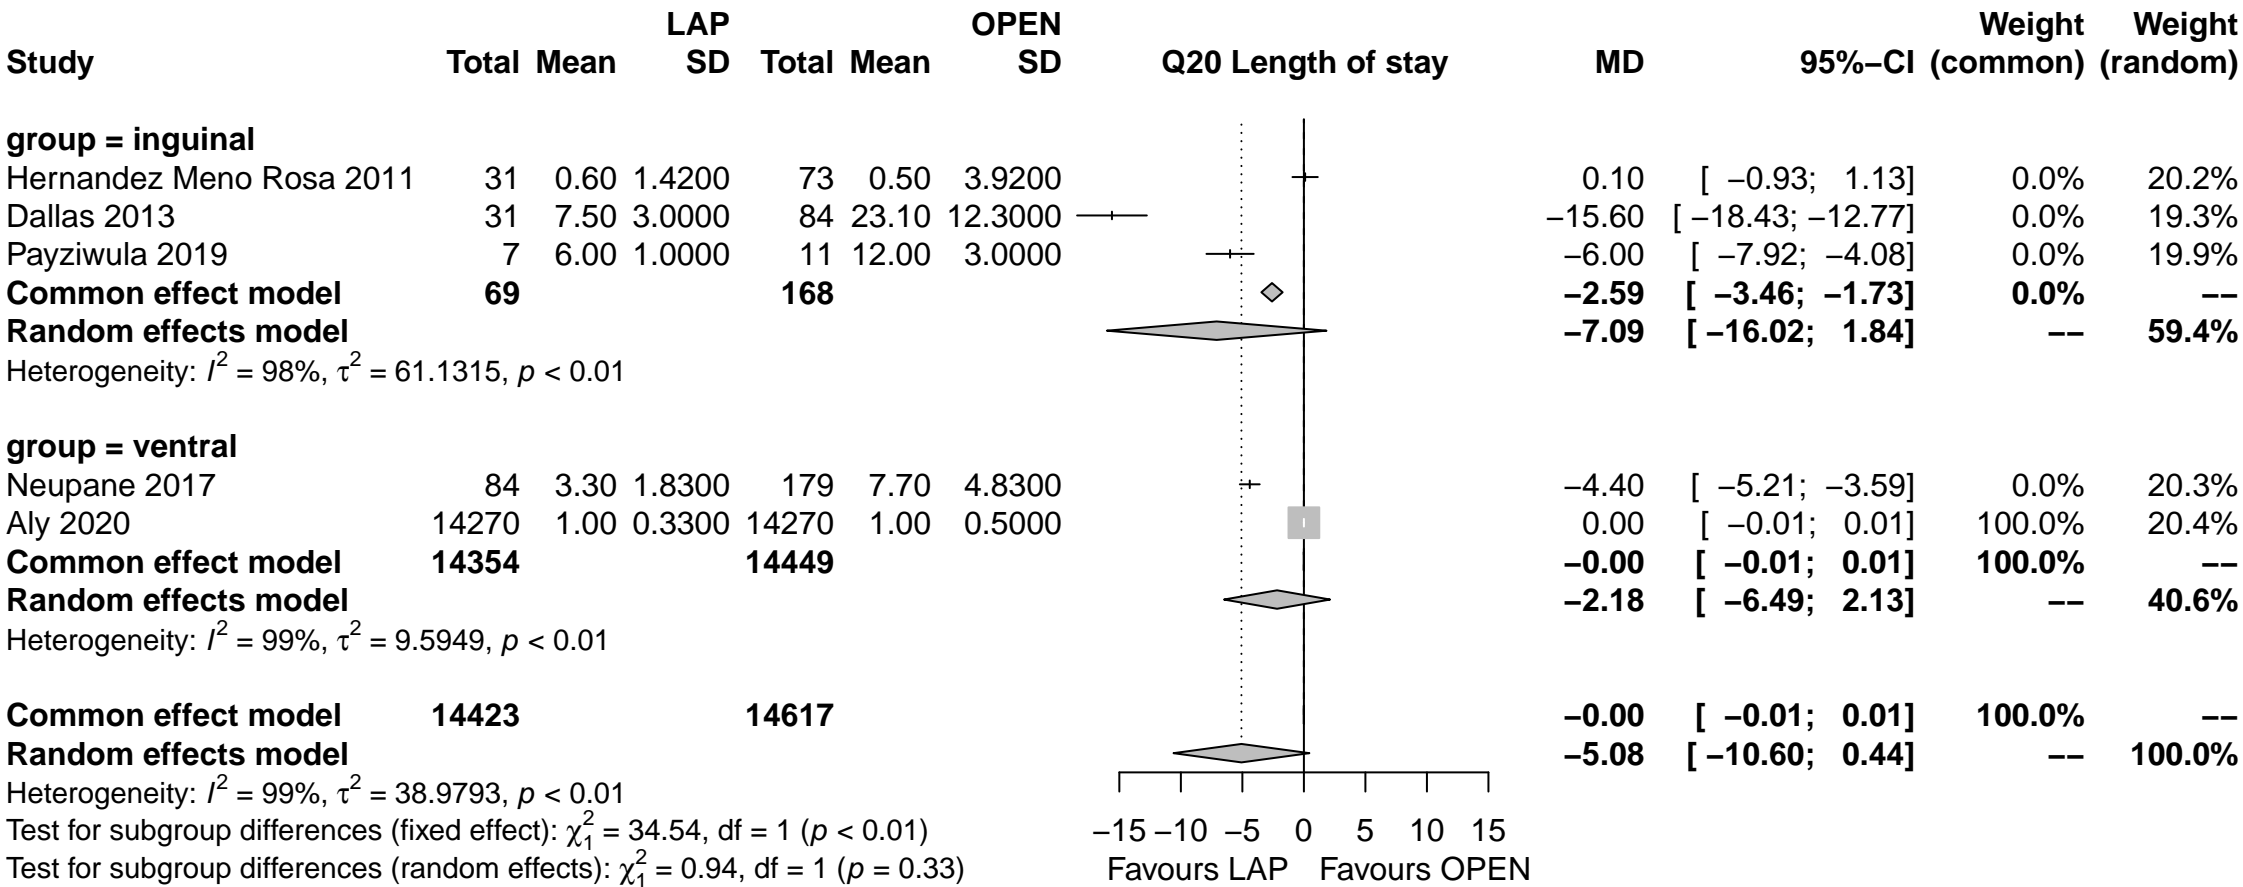

## Q21 – ERAS versus Conventional Care for Colorectal Surgery in Elderly Patients

### Q21 30-Day Complications

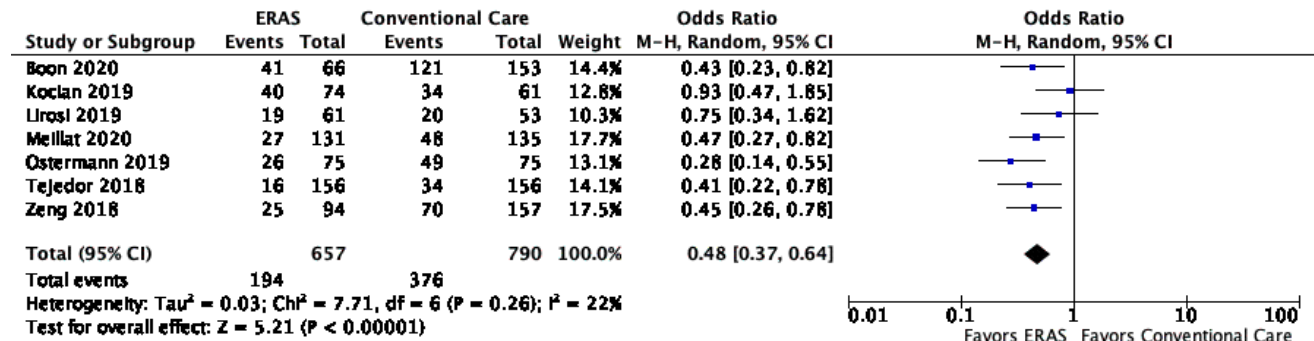

### Q21 Length of Stay

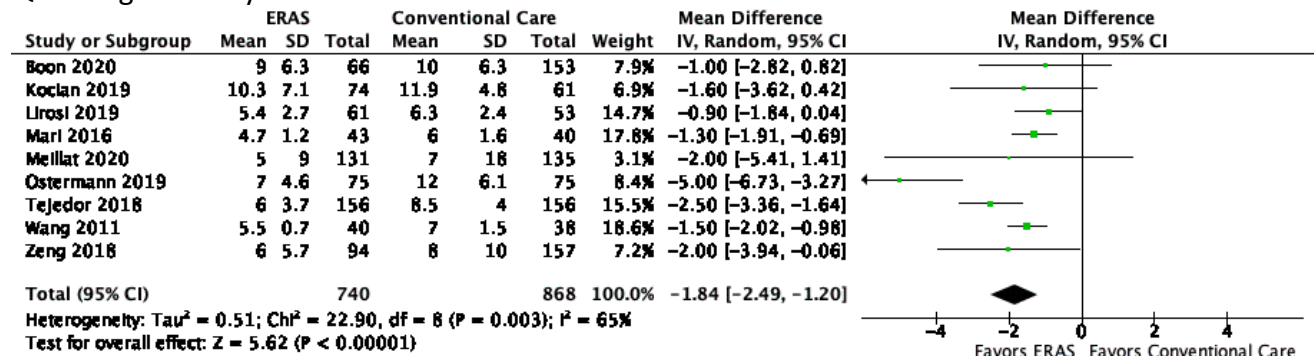

### Q21 Readmissions

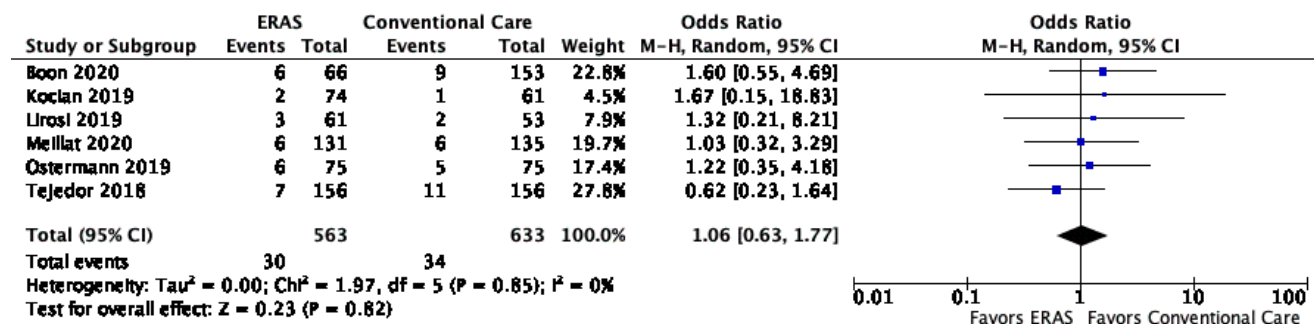

## Q22 – ERAS versus Conventional Care for Gastric Surgery in Elderly Patients

### Q22 30-day Complications

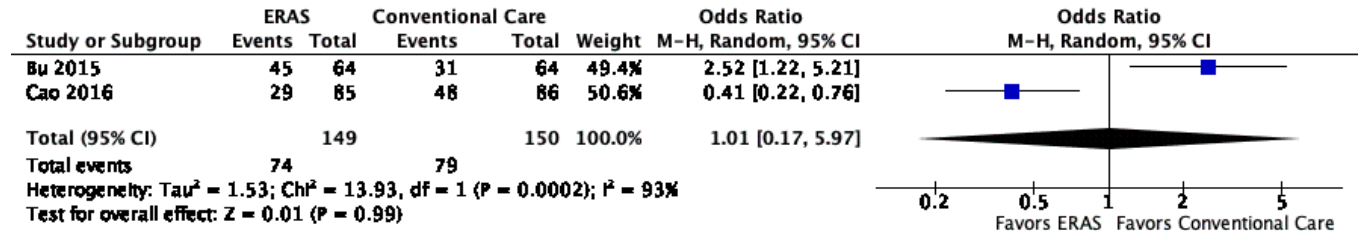

### Q22 Length of Stay

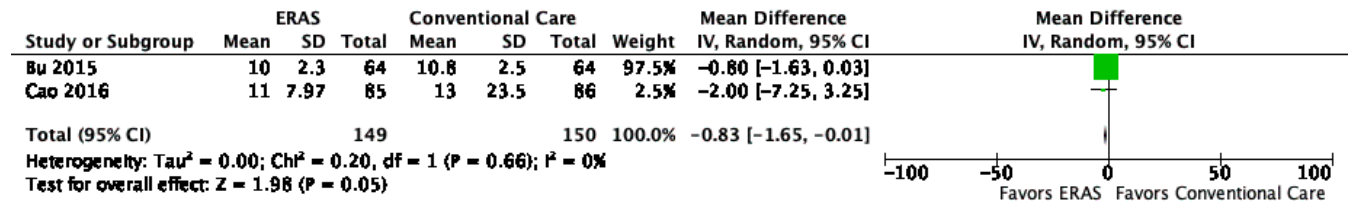

### Q22 Readmissions

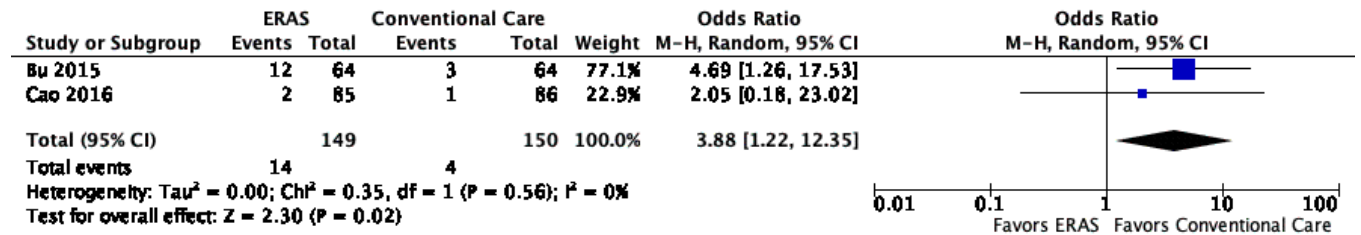

## Q23 – ERAS versus Conventional Care for HPB Surgery in Elderly Patients

### Q23 30-day Complications

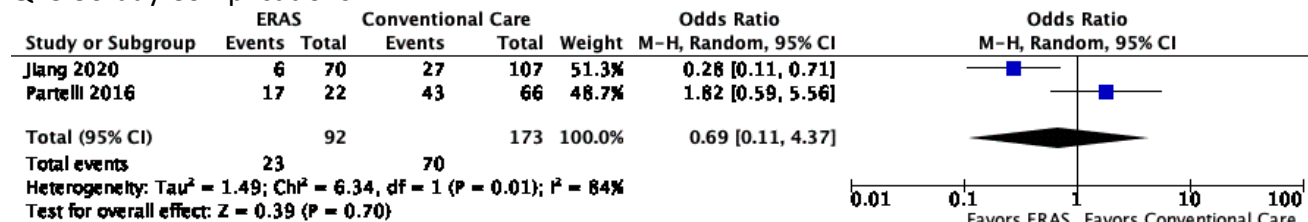

### Q23 Length of Stay

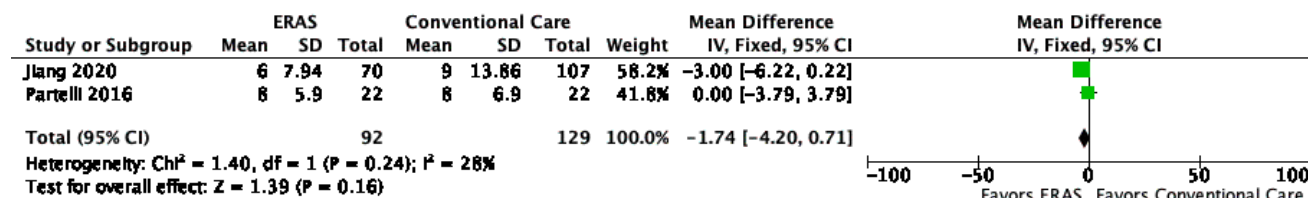

### Q23 Readmissions

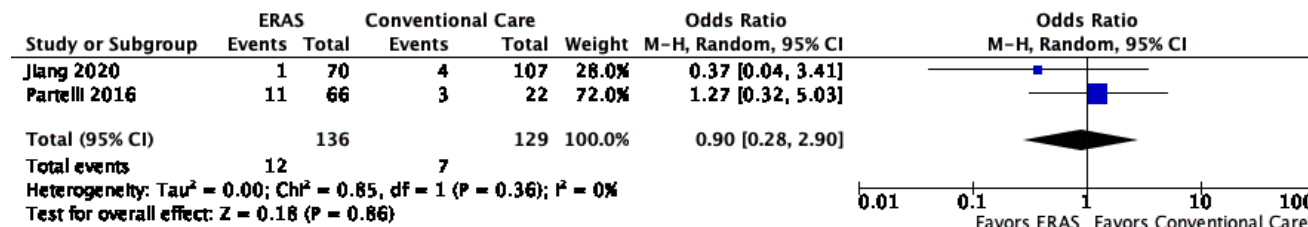



**Q24 – ERAS versus Conventional Care for Foregut Surgery in Elderly Patients**

No studies found
